# Supplementary material for: Inflammatory bowel diseases, interleukin-6 and interleukin-6 receptor subunit alpha in causal association with cerebral cortical structure: a Mendelian randomization analysis
Source: PubMed Central journal article supplement (PMC10157470; doi:10.3389/fimmu.2023.1154746), 2023-04-20
Supplement: DataSheet_1.pdf [file DataSheet_1.pdf]

---

**Supplementary materials:**

**(1) Data visualization information**

**(2) Sensitivity analysis**

**(3) Heterogeneity analysis.**

**Inflammatory bowel diseases, interleukin-6 and  
interleukin-6 receptor subunit alpha in causal  
association with cerebral cortical structure: A  
Mendelian Randomization Analysis**

Chunlong Liu <sup>a1</sup>, Shijie Zhu <sup>b1</sup>, Jian Zhang <sup>c1</sup>, Kuiwu Ren <sup>a</sup>, Kangkang Li <sup>d</sup>, Jiangtao Yu <sup>a\*</sup>

---

## **Abbreviations**

MR: Mendelian Randomization

IBD: inflammatory bowel disease

CD: Crohn's disease

UC: Ulcerative colitis

SA: surface area

TH: thickness

IL-6: interleukin 6

IL-6 $\alpha$ : interleukin 6 receptor subunit  $\alpha$

IIBDGC: International Inflammatory Bowel Disease Genetics Consortium

ENIGMA: The Enhancing Neuroimaging Genetics through Meta-Analysis Consortium

MR PRESSO: Mendelian randomization pleiotropy residual sum and outlier

---

Table S1. Data Visualization tools.

Table S2. Descriptions of study cohorts.

Table S3. 114 index SNPs represented genetically predicted IBD.

Table S4. 82 index SNPs represented genetically predicted CD.

Table S5. 60 index SNPs represented genetically predicted UC.

Table S6. 13 index SNPs represented genetically predicted IL-6 levels.

Table S7. 7 index SNPs represented genetically predicted IL-6 $\alpha$ .

Table S8. Information of outliers detected by MR PRESSO.

Figure S1. Scatter plots of significant results from MR analysis.

Figure S2. Leave-one-out analysis of significant results from MR analysis.

Figure S3. Funnel plots of significant results from MR analysis.

Figure S4. Scatter plots of nominal significant results from genetically predicted IBD on brain cortical structures.

Figure S5. Leave-one-out analysis of nominal significant results from genetically predicted IBD on brain cortical structures.

Figure S6. Funnel plots of nominal significant results from genetically predicted IBD on brain cortical structures.

Figure S7. Sensitivity analysis of nominal significant results from genetically predicted CD on brain cortical structures.

Figure S8. Scatter plots of nominal significant results from genetically predicted UC on brain cortical structures.

Figure S9. Leave-one-out analysis of nominal significant results from genetically predicted UC on brain cortical structures.

Figure S10. Funnel plots of nominal significant results from genetically predicted UC on brain cortical structures.

Figure S11. Sensitivity analysis of nominal significant results from genetically predicted IL-6 on brain cortical structures.

Figure S12. Sensitivity analysis of nominal significant results from genetically predicted IL-6 on brain cortical structures.

Figure S13. Scatter plots of nominal significant results from genetically predicted IL-6 $\alpha$  on brain cortical structures.

---

Figure S14. Leave-one-out analysis of nominal significant results from genetically predicted IL-6 $\alpha$  on brain cortical structures.

Figure S15. Funnel plots of nominal significant results from genetically predicted IL-6 $\alpha$  on brain cortical structures.

Table S1. Data Visualization tools.

| Software and algorithms   | SOURCE                                 | IDENTIFIER                                                                                                                                    |
|---------------------------|----------------------------------------|-----------------------------------------------------------------------------------------------------------------------------------------------|
| R 4.1.2                   | R Foundation for Statistical Computing | <a href="https://www.r-project.org/">https://www.r-project.org/</a>                                                                           |
| Adobe illustrator CC 2019 | Adobe company                          | <a href="https://www.adobe.com/cn">https://www.adobe.com/cn</a>                                                                               |
| devtools 2.4.4            | Jennifer Bryan et.al                   | <a href="https://CRAN.R-project.org/package=devtools">https://CRAN.R-project.org/package=devtools</a>                                         |
| remotes 2.4.2             | Gábor Csárdi et.al                     | <a href="https://CRAN.R-project.org/package=remotes">https://CRAN.R-project.org/package=remotes</a>                                           |
| TwoSampleMR 0.5.6         | Gibran Hemani                          | <a href="https://mrcieu.github.io/TwoSampleMR/articles/introduction.html">https://mrcieu.github.io/TwoSampleMR/articles/introduction.html</a> |
| plyr 1.8.7                | Hadley Wickham                         | <a href="https://CRAN.R-project.org/package=plyr">https://CRAN.R-project.org/package=plyr</a>                                                 |
| circlize 0.4.15           | Zuguang Gu                             | <a href="https://CRAN.R-project.org/package=circlize">https://CRAN.R-project.org/package=circlize</a>                                         |
| ComplexHeatmap 2.13.1     | Zuguang Gu                             | <a href="https://github.com/jokergoo/ComplexHeatmap">https://github.com/jokergoo/ComplexHeatmap</a>                                           |
| ggplot2 3.3.6             | Hadley Wickham et.al                   | <a href="https://CRAN.R-project.org/package=ggplot2">https://CRAN.R-project.org/package=ggplot2</a>                                           |
| ggseg 1.6.5               | Athanasia Mo Mowinckel et.al           | <a href="https://CRAN.R-project.org/package=ggseg">https://CRAN.R-project.org/package=ggseg</a>                                               |

Table S2. Descriptions of study cohorts.

| Major Study name                                                                                                    | PMID                                                  | Category | Total    | Major Ancestry | Detailed                                                                                | Cohort/study names                                                                      | PMID of cohort/study | N     | case  | control  | Ancestry |          |
|---------------------------------------------------------------------------------------------------------------------|-------------------------------------------------------|----------|----------|----------------|-----------------------------------------------------------------------------------------|-----------------------------------------------------------------------------------------|----------------------|-------|-------|----------|----------|----------|
| Genome-wide association study implicates immune activation of multiple integrin genes in inflammatory bowel disease | 28067908                                              | IBD      | 59957    | European       | New added data                                                                          | UK low coverage whole genome sequencing IBD study;UK HumanCoreExome genotyped IBD study | 28067908             | 25305 | 12160 | 13145    | European |          |
|                                                                                                                     |                                                       |          |          | European       | Old data                                                                                | IBDGC                                                                                   | 26192919             | 34652 | 12882 | 21770    | European |          |
|                                                                                                                     |                                                       | CD       | 40226    | European       | New added data                                                                          | UK low coverage whole genome sequencing IBD study;UK HumanCoreExome genotyped IBD study |                      | 19343 | 6238  | 13105    | European |          |
|                                                                                                                     |                                                       |          |          | European       | Old data                                                                                | IBDGC                                                                                   |                      | 20883 | 5956  | 14927    | European |          |
|                                                                                                                     | UC                                                    | 45975    | European | New added data | UK low coverage whole genome sequencing IBD study;UK HumanCoreExome genotyped IBD study |                                                                                         | 18543                | 5398  | 13145 | European |          |          |
|                                                                                                                     |                                                       |          | European | Old data       | IBDGC                                                                                   |                                                                                         | 27432                | 6968  | 20464 | European |          |          |
|                                                                                                                     | The genetic architecture of the human cerebral cortex | 32193296 |          | 51665          | European                                                                                | principal                                                                               | 1000BRAINS           |       | 775   | 775      | NA       | European |
|                                                                                                                     |                                                       |          |          |                |                                                                                         | ADNI1                                                                                   |                      | 735   | 735   | NA       | European |          |
|                                                                                                                     |                                                       |          |          |                | ADNI2GO                                                                                 |                                                                                         | 649                  | 649   | NA    | European |          |          |
|                                                                                                                     |                                                       |          |          |                | ALSPACa                                                                                 |                                                                                         | 391                  | 391   | NA    | European |          |          |

---

|               |      |      |    |          |
|---------------|------|------|----|----------|
| ASRB          | 233  | 233  | NA | European |
| BETULA        | 311  | 311  | NA | European |
| BIG-Affy      | 1180 | 1180 | NA | European |
| BIG-PsychChip | 432  | 432  | NA | European |
| BONN          | 102  | 102  | NA | European |
| BrainScale    | 242  | 242  | NA | European |
| CARDIFF       | 270  | 270  | NA | European |
| DNS-V3        | 324  | 324  | NA | European |
| DNS-V4        | 191  | 191  | NA | European |
| EPIGEN        | 178  | 178  | NA | European |
| FOR2107       | 785  | 785  | NA | European |
| GIG           | 283  | 283  | NA | European |
| GSP           | 442  | 442  | NA | European |
| HUBIN         | 177  | 177  | NA | European |
| HUNT          | 876  | 876  | NA | European |
| IMAGEN        | 1358 | 1358 | NA | European |
| IMpACT        | 238  | 238  | NA | European |
| LBC1936       | 604  | 604  | NA | European |
| LIBD          | 484  | 484  | NA | European |
| MCIC          | 162  | 162  | NA | European |
| MooDS         | 282  | 282  | NA | European |
| MPIP          | 550  | 550  | NA | European |
| MPRC          | 387  | 387  | NA | European |
| MÜNSTER       | 985  | 985  | NA | European |
| NCNG          | 321  | 321  | NA | European |

---

|            |      |      |    |                     |
|------------|------|------|----|---------------------|
| NESDA      | 254  | 254  | NA | European            |
| NeuroIMAGE | 210  | 210  | NA | European            |
| NTR        | 322  | 322  | NA | European            |
| OATS       | 360  | 360  | NA | European            |
| PAFIP      | 112  | 112  | NA | European            |
| PDNZ       | 164  | 164  | NA | European            |
| PING       | 337  | 337  | NA | European            |
| PPMI       | 414  | 414  | NA | European            |
| QTIM       | 996  | 996  | NA | European            |
| SHIP       | 1118 | 1118 | NA | European            |
| SHIP-Trend | 891  | 891  | NA | European            |
| Sydney MAS | 494  | 494  | NA | European            |
| SYS        | 1675 | 1675 | NA | European            |
| TCD-NUIG   | 192  | 192  | NA | European            |
| TOP        | 505  | 505  | NA | European            |
| TOP3T      | 400  | 400  | NA | European            |
| UiO2016    | 229  | 229  | NA | European            |
| UiO2017    | 308  | 308  | NA | European            |
| UMCU       | 698  | 698  | NA | European            |
| FBIRN      | 283  | 283  | NA | Mixed               |
| GOBS       | 1272 | 1272 | NA | Mexican<br>American |
| IMH        | 152  | 152  | NA | Singapore           |
| Meth-CT    | 130  | 130  | NA | South<br>African    |



|                                                                                        |          |       |          |             |                |                     |       |       |    |                               |
|----------------------------------------------------------------------------------------|----------|-------|----------|-------------|----------------|---------------------|-------|-------|----|-------------------------------|
|                                                                                        |          |       |          |             |                |                     |       |       |    | European and African American |
|                                                                                        |          |       |          |             | MIRECC         |                     | 253   | 253   | NA |                               |
|                                                                                        |          |       |          |             | OSAKA          |                     | 401   | 401   | NA | Japanese                      |
|                                                                                        |          |       |          |             | UNICAMP        |                     | 141   | 141   | NA | Brazil                        |
|                                                                                        |          |       |          |             | PING-nonEUR    |                     | 331   | 331   | NA | Non European                  |
|                                                                                        |          |       |          |             | UKBB-nonEUR    |                     | 264   | 264   | NA | Non European                  |
|                                                                                        |          |       |          |             | UKBB           |                     | 10083 | 10083 | NA | European                      |
|                                                                                        |          |       |          | Replication | ID1000         |                     | 777   | 777   | NA | European                      |
|                                                                                        |          |       |          |             | CHARGE         |                     | 13952 | 13952 | NA | Mixed                         |
| Genomic and drug target evaluation of 90 cardiovascular proteins in 30,931 individuals | 33067605 | 21758 | European | principal   | IMPROVE        | 23152477            | 3700  | 3430  | NA | European                      |
|                                                                                        |          |       |          |             | STANLEY        |                     | 10000 | 681   | NA | Swedish                       |
|                                                                                        |          |       |          |             | EpiHealth      | 23435790            | 2500  | 2335  | NA | European                      |
|                                                                                        |          |       |          |             | PIVUS          | 16141402            | 1016  | 933   | NA | European                      |
|                                                                                        |          |       |          |             | ULSAM          | 16030278            | 1221  | 730   | NA | European                      |
|                                                                                        |          |       |          |             | INTERVAL       | 27863252            | 4994  | 4,987 | NA | European                      |
|                                                                                        |          |       |          |             | LifeLines-DEEP | 26319774            | 1539  | 1178  | NA | European                      |
|                                                                                        |          |       |          |             | NSPHS          | 19060911 & 20568910 | 1067  | 965   | NA | European                      |

---

|             |          |       |       |    |                                                                               |
|-------------|----------|-------|-------|----|-------------------------------------------------------------------------------|
| STABILITY   | 24678955 | 15828 | 2,967 | NA | Worldwide<br>(78%<br>reported<br>with ethnic<br>group white<br>in main trial) |
| Estonian BB | 24518929 | 500   | 496   | NA | European                                                                      |
| ORCADES     | 18760389 | 2078  | 971   | NA | European                                                                      |
| VIS         |          | 960   |       | NA | European                                                                      |
| MPP-RES     | 20211303 | 1792  | 882   | NA | European                                                                      |

---

Table S3. 114 index SNPs represented genetically predicted IBD.

| se.exposure | chr.exposure | pval.exposure | beta.exposure | samplesize.exposure | pos.exposure | SNP         | effect_allele.exposure | other_allele.exposure | eaf.exposure | R2       | F-statistic |
|-------------|--------------|---------------|---------------|---------------------|--------------|-------------|------------------------|-----------------------|--------------|----------|-------------|
| 0.0142      | 1            | 1.02E-09      | 0.087         | 59957               | 1.73E+08     | rs12136659  | C                      | T                     | NA           | 0.000626 | 37.53594    |
| 0.0149      | 1            | 3.63E-11      | 0.0985        | 59957               | 1.98E+08     | rs2488398   | C                      | G                     | NA           | 0.000728 | 43.7004     |
| 0.0164      | 1            | 1.58E-15      | 0.1308        | 59957               | 8168261      | rs10746475  | A                      | T                     | NA           | 0.00106  | 63.60823    |
| 0.0124      | 1            | 4.8E-21       | -0.1172       | 59957               | 20227723     | rs4654925   | C                      | G                     | NA           | 0.001488 | 89.33001    |
| 0.0332      | 1            | 2.89E-08      | -0.1844       | 59957               | 39802381     | rs112936798 | C                      | A                     | NA           | 0.000514 | 30.8483     |
| 0.014       | 1            | 7.5E-22       | -0.1346       | 59957               | 2.01E+08     | rs35730213  | C                      | G                     | NA           | 0.001539 | 92.43141    |
| 0.0165      | 1            | 4.04E-31      | 0.1911        | 59957               | 2.07E+08     | rs3024493   | A                      | C                     | NA           | 0.002232 | 134.134     |
| 0.0124      | 1            | 4.46E-10      | 0.0773        | 59957               | 67656286     | rs11209013  | G                      | A                     | NA           | 0.000648 | 38.85985    |
| 0.0294      | 1            | 4.6E-111      | -0.6578       | 59957               | 67707690     | rs11581607  | A                      | G                     | NA           | 0.00828  | 500.5859    |
| 0.0128      | 1            | 2.98E-11      | -0.0848       | 59957               | 1.51E+08     | rs1336900   | A                      | G                     | NA           | 0.000731 | 43.88916    |
| 0.0133      | 1            | 1.94E-20      | -0.123        | 59957               | 1.61E+08     | rs10800309  | G                      | A                     | NA           | 0.001424 | 85.52488    |
| 0.0163      | 1            | 2.75E-08      | 0.0907        | 59957               | 1215424      | rs1268339   | C                      | T                     | NA           | 0.000516 | 30.96171    |
| 0.016       | 1            | 3.79E-13      | 0.1164        | 59957               | 20140036     | rs1317209   | A                      | G                     | NA           | 0.000882 | 52.92386    |
| 0.014       | 1            | 1.72E-10      | -0.0892       | 59957               | 20142413     | rs3820330   | A                      | C                     | NA           | 0.000677 | 40.59375    |
| 0.0134      | 1            | 3.83E-09      | 0.0789        | 59957               | 1.61E+08     | rs7532133   | G                      | A                     | NA           | 0.000578 | 34.66809    |
| 0.0126      | 2            | 1.37E-13      | -0.0931       | 59957               | 28614401     | rs11677002  | C                      | T                     | NA           | 0.00091  | 54.59386    |
| 0.018       | 2            | 5.45E-13      | 0.1298        | 59957               | 43851246     | rs55946629  | A                      | C                     | NA           | 0.000867 | 51.99839    |
| 0.013       | 2            | 7.63E-15      | 0.1011        | 59957               | 2.42E+08     | rs4676408   | A                      | G                     | NA           | 0.001008 | 60.47852    |
| 0.0126      | 2            | 1.67E-28      | 0.1395        | 59957               | 61204641     | rs7608697   | C                      | A                     | NA           | 0.00204  | 122.5724    |
| 0.0205      | 2            | 2.56E-08      | -0.1143       | 59957               | 1.88E+08     | rs13422838  | C                      | T                     | NA           | 0.000518 | 31.08639    |
| 0.0132      | 2            | 1.55E-09      | -0.0797       | 59957               | 2E+08        | rs62180107  | C                      | G                     | NA           | 0.000608 | 36.45476    |

---

|        |   |          |         |       |          |            |   |   |    |          |          |
|--------|---|----------|---------|-------|----------|------------|---|---|----|----------|----------|
| 0.0124 | 2 | 5.12E-29 | 0.1391  | 59957 | 2.34E+08 | rs3792111  | T | C | NA | 0.002094 | 125.8335 |
| 0.0123 | 2 | 8.9E-12  | -0.0843 | 59957 | 1.03E+08 | rs1558619  | T | G | NA | 0.000783 | 46.97107 |
| 0.0151 | 2 | 4.65E-11 | 0.0996  | 59957 | 25195577 | rs76286777 | C | T | NA | 0.000725 | 43.50611 |
| 0.0202 | 2 | 2.3E-08  | -0.1129 | 59957 | 1.45E+08 | rs72852162 | C | A | NA | 0.000521 | 31.2371  |
| 0.0125 | 2 | 1.22E-13 | -0.0924 | 59957 | 1.82E+08 | rs6740847  | G | A | NA | 0.000911 | 54.63984 |
| 0.0125 | 2 | 4.49E-10 | -0.078  | 59957 | 2.19E+08 | rs62183956 | T | C | NA | 0.000649 | 38.9363  |
| 0.0131 | 3 | 1.22E-35 | 0.1635  | 59957 | 49714225 | rs1131095  | C | T | NA | 0.002591 | 155.7681 |
| 0.0163 | 3 | 9.27E-10 | -0.1    | 59957 | 1.88E+08 | rs56116661 | T | C | NA | 0.000627 | 37.63659 |
| 0.0417 | 3 | 3.72E-08 | 0.2293  | 59957 | 17184935 | rs77272631 | C | G | NA | 0.000504 | 30.2358  |
| 0.0124 | 3 | 2.67E-08 | -0.0692 | 59957 | 1.01E+08 | rs503734   | G | A | NA | 0.000519 | 31.14256 |
| 0.014  | 3 | 2.54E-09 | -0.0832 | 59957 | 71175495 | rs2593855  | T | C | NA | 0.000589 | 35.31637 |
| 0.0127 | 4 | 4.8E-08  | 0.0694  | 59957 | 38588453 | rs11734570 | A | G | NA | 0.000498 | 29.8605  |
| 0.0127 | 4 | 2.67E-12 | 0.0886  | 59957 | 1.24E+08 | rs62324212 | A | C | NA | 0.000811 | 48.66823 |
| 0.0155 | 5 | 3.37E-14 | -0.1179 | 59957 | 40207142 | rs4957256  | T | C | NA | 0.000964 | 57.85618 |
| 0.0125 | 5 | 5.17E-09 | 0.0731  | 59957 | 1.5E+08  | rs17656349 | T | C | NA | 0.00057  | 34.19796 |
| 0.0189 | 5 | 4.01E-11 | 0.125   | 59957 | 1.5E+08  | rs6579807  | T | C | NA | 0.000729 | 43.74032 |
| 0.0127 | 5 | 3.48E-40 | 0.1689  | 59957 | 40414419 | rs1445004  | T | C | NA | 0.002941 | 176.8632 |
| 0.0142 | 5 | 4.23E-08 | -0.0776 | 59957 | 1.59E+08 | rs62378712 | C | T | NA | 0.000498 | 29.86292 |
| 0.0128 | 5 | 6.15E-13 | -0.0919 | 59957 | 96247810 | rs6873866  | C | T | NA | 0.000859 | 51.54619 |
| 0.0129 | 5 | 1.95E-10 | 0.0819  | 59957 | 1.42E+08 | rs10041497 | C | T | NA | 0.000672 | 40.30639 |
| 0.0134 | 5 | 1.59E-39 | 0.1767  | 59957 | 1.59E+08 | rs755374   | T | C | NA | 0.002892 | 173.8798 |
| 0.0138 | 5 | 1.77E-10 | 0.0877  | 59957 | 1.77E+08 | rs56235845 | G | T | NA | 0.000673 | 40.3856  |
| 0.0125 | 5 | 1.1E-27  | 0.1366  | 59957 | 1.32E+08 | rs11739135 | C | G | NA | 0.001988 | 119.4172 |
| 0.0124 | 5 | 1.45E-08 | 0.0702  | 59957 | 1.12E+08 | rs341295   | T | C | NA | 0.000534 | 32.04914 |
| 0.0133 | 6 | 1.56E-14 | 0.1019  | 59957 | 1.06E+08 | rs11152949 | G | A | NA | 0.000978 | 58.69899 |

---

|        |    |          |         |       |          |             |   |   |    |          |          |
|--------|----|----------|---------|-------|----------|-------------|---|---|----|----------|----------|
| 0.0159 | 6  | 3.39E-11 | 0.1053  | 59957 | 14716017 | rs1267496   | C | G | NA | 0.000731 | 43.85792 |
| 0.0476 | 6  | 4.73E-73 | 0.86    | 59957 | 32247045 | rs145568234 | G | T | NA | 0.005415 | 326.4138 |
| 0.0153 | 6  | 3.75E-28 | -0.1687 | 59957 | 32773497 | rs6457681   | T | G | NA | 0.002024 | 121.5718 |
| 0.0152 | 6  | 7.14E-12 | 0.1043  | 59957 | 20678430 | rs4712528   | C | G | NA | 0.000785 | 47.08331 |
| 0.036  | 6  | 3.14E-15 | 0.2836  | 59957 | 31492353 | rs143210366 | G | T | NA | 0.001034 | 62.05731 |
| 0.0129 | 6  | 2.4E-10  | -0.0818 | 59957 | 90931858 | rs62408218  | T | C | NA | 0.00067  | 40.20802 |
| 0.013  | 6  | 1.06E-08 | -0.0743 | 59957 | 1.59E+08 | rs212402    | A | G | NA | 0.000545 | 32.66453 |
| 0.0237 | 6  | 2.28E-11 | -0.1583 | 59957 | 31923654 | rs34140409  | T | C | NA | 0.000744 | 44.61189 |
| 0.0149 | 6  | 6.64E-09 | 0.0863  | 59957 | 1.38E+08 | rs6933404   | C | T | NA | 0.000559 | 33.54552 |
| 0.0123 | 6  | 1.16E-18 | 0.1088  | 59957 | 1.67E+08 | rs35171809  | G | A | NA | 0.001303 | 78.24076 |
| 0.0127 | 7  | 4.94E-16 | -0.1033 | 59957 | 1.07E+08 | rs10953551  | G | A | NA | 0.001102 | 66.15744 |
| 0.0128 | 7  | 3.04E-10 | -0.0805 | 59957 | 1.48E+08 | rs243505    | G | A | NA | 0.000659 | 39.55099 |
| 0.0242 | 7  | 3.26E-08 | -0.1338 | 59957 | 20577298 | rs149169037 | A | G | NA | 0.00051  | 30.568   |
| 0.0133 | 7  | 4.5E-11  | 0.0879  | 59957 | 50304461 | rs1456896   | T | C | NA | 0.000728 | 43.67772 |
| 0.0131 | 7  | 1.97E-08 | -0.0737 | 59957 | 1.01E+08 | rs62482552  | A | G | NA | 0.000528 | 31.6503  |
| 0.0152 | 7  | 3.88E-08 | -0.0837 | 59957 | 6545188  | rs11768365  | G | A | NA | 0.000505 | 30.3214  |
| 0.0669 | 8  | 8.95E-09 | -0.3848 | 59957 | 21986850 | rs78771661  | T | C | NA | 0.000551 | 33.08289 |
| 0.0127 | 8  | 1.12E-12 | 0.0907  | 59957 | 1.27E+08 | rs4380956   | A | G | NA | 0.00085  | 51.00264 |
| 0.0189 | 8  | 1.41E-08 | -0.1074 | 59957 | 1.3E+08  | rs938650    | A | G | NA | 0.000538 | 32.29018 |
| 0.0131 | 9  | 2.46E-36 | -0.1643 | 59957 | 4984530  | rs1887428   | C | G | NA | 0.002617 | 157.2961 |
| 0.0137 | 9  | 4.1E-27  | 0.1475  | 59957 | 1.18E+08 | rs10114470  | C | T | NA | 0.00193  | 115.912  |
| 0.0125 | 9  | 3.52E-36 | 0.1574  | 59957 | 1.39E+08 | rs3829110   | G | A | NA | 0.002638 | 158.5532 |
| 0.0138 | 10 | 1.11E-12 | -0.098  | 59957 | 81042475 | rs1250573   | A | G | NA | 0.00084  | 50.4289  |
| 0.0136 | 10 | 3.99E-13 | -0.099  | 59957 | 30690376 | rs10826797  | T | G | NA | 0.000883 | 52.98807 |
| 0.0124 | 10 | 1.19E-34 | -0.152  | 59957 | 1.01E+08 | rs6584282   | G | A | NA | 0.0025   | 150.2551 |

---

|        |    |          |         |       |          |             |   |   |    |          |          |
|--------|----|----------|---------|-------|----------|-------------|---|---|----|----------|----------|
| 0.0133 | 10 | 2.74E-09 | 0.0792  | 59957 | 1.12E+08 | rs11195128  | T | C | NA | 0.000591 | 35.4595  |
| 0.0131 | 10 | 3.12E-13 | 0.0951  | 59957 | 35492832 | rs2384352   | G | A | NA | 0.000878 | 52.69919 |
| 0.0126 | 10 | 2.3E-36  | 0.1585  | 59957 | 64445564 | rs10761659  | G | A | NA | 0.002632 | 158.2351 |
| 0.0125 | 10 | 1.38E-08 | 0.071   | 59957 | 94429467 | rs7918084   | T | C | NA | 0.000538 | 32.26132 |
| 0.017  | 10 | 1.18E-09 | -0.1031 | 59957 | 1.26E+08 | rs111456533 | A | G | NA | 0.000613 | 36.77943 |
| 0.0148 | 11 | 2.44E-08 | 0.0827  | 59957 | 1.28E+08 | rs11221335  | C | T | NA | 0.000521 | 31.22289 |
| 0.0125 | 11 | 7.19E-33 | 0.1488  | 59957 | 76299649 | rs11236797  | A | C | NA | 0.002358 | 141.7005 |
| 0.0411 | 12 | 4.53E-17 | 0.3452  | 59957 | 40822098 | rs117981694 | A | G | NA | 0.001175 | 70.5413  |
| 0.0127 | 12 | 1.27E-25 | 0.1324  | 59957 | 68492980 | rs12825700  | A | G | NA | 0.001809 | 108.6811 |
| 0.0145 | 13 | 1.9E-11  | 0.0971  | 59957 | 27542030 | rs3897234   | C | T | NA | 0.000747 | 44.84231 |
| 0.0305 | 13 | 1.13E-09 | -0.1857 | 59957 | 40836270 | rs140933577 | C | T | NA | 0.000618 | 37.0689  |
| 0.0124 | 14 | 1.84E-11 | 0.0833  | 59957 | 69282887 | rs194746    | T | C | NA | 0.000752 | 45.12655 |
| 0.0207 | 14 | 1.1E-13  | 0.1536  | 59957 | 88417517 | rs3850378   | C | T | NA | 0.000917 | 55.05886 |
| 0.1782 | 15 | 6.27E-14 | 1.3366  | 59957 | 80205354 | rs1864239   | G | A | NA | 0.000937 | 56.25654 |
| 0.0145 | 15 | 1.37E-21 | 0.1382  | 59957 | 67455630 | rs56062135  | T | C | NA | 0.001513 | 90.83759 |
| 0.0155 | 16 | 2.06E-08 | -0.0872 | 59957 | 23855853 | rs7190426   | C | A | NA | 0.000528 | 31.64864 |
| 0.0137 | 16 | 6.55E-16 | -0.1105 | 59957 | 28489342 | rs28374519  | A | G | NA | 0.001084 | 65.05324 |
| 0.0172 | 16 | 8.77E-11 | -0.1116 | 59957 | 50383077 | rs9934775   | T | C | NA | 0.000702 | 42.09757 |
| 0.0327 | 16 | 2.99E-17 | 0.2765  | 59957 | 50885211 | rs8056255   | A | T | NA | 0.001191 | 71.49576 |
| 0.0362 | 16 | 5.18E-11 | -0.2374 | 59957 | 81916912 | rs11548656  | G | A | NA | 0.000717 | 43.00607 |
| 0.0138 | 16 | 7.83E-46 | 0.1961  | 59957 | 50758849 | rs749910    | A | G | NA | 0.003357 | 201.9215 |
| 0.0126 | 16 | 4.96E-10 | 0.0783  | 59957 | 11367477 | rs2301127   | A | G | NA | 0.000644 | 38.61606 |
| 0.0169 | 16 | 2.5E-11  | 0.113   | 59957 | 86014241 | rs16940202  | C | T | NA | 0.000745 | 44.70633 |
| 0.0124 | 17 | 7.73E-30 | 0.1406  | 59957 | 38043649 | rs12936409  | T | C | NA | 0.00214  | 128.562  |
| 0.0126 | 17 | 1.34E-18 | -0.1109 | 59957 | 40514201 | rs744166    | G | A | NA | 0.00129  | 77.46535 |

---

|        |    |          |         |       |          |             |    |   |    |          |          |
|--------|----|----------|---------|-------|----------|-------------|----|---|----|----------|----------|
| 0.0139 | 17 | 6.23E-12 | -0.0959 | 59957 | 32617265 | rs714910    | C  | A | NA | 0.000793 | 47.59848 |
| 0.018  | 17 | 2.47E-13 | -0.1319 | 59957 | 70611194 | rs113846785 | CG | C | NA | 0.000895 | 53.69454 |
| 0.0147 | 18 | 7.5E-09  | -0.0851 | 59957 | 46404813 | rs1319951   | G  | C | NA | 0.000559 | 33.51274 |
| 0.019  | 18 | 1.04E-16 | 0.1581  | 59957 | 12818922 | rs80262450  | A  | G | NA | 0.001153 | 69.23761 |
| 0.0152 | 19 | 4.24E-17 | 0.1281  | 59957 | 1123378  | rs4807569   | C  | A | NA | 0.001183 | 71.0226  |
| 0.0276 | 19 | 1.63E-09 | -0.1665 | 59957 | 10626375 | rs7256518   | A  | G | NA | 0.000607 | 36.39115 |
| 0.0166 | 19 | 2.6E-17  | 0.1407  | 59957 | 33748183 | rs62126610  | G  | A | NA | 0.001197 | 71.83855 |
| 0.0157 | 19 | 1.84E-12 | -0.1107 | 59957 | 10496621 | rs11669299  | T  | C | NA | 0.000829 | 49.71431 |
| 0.0138 | 20 | 1.23E-08 | 0.0786  | 59957 | 6093889  | rs4256018   | G  | T | NA | 0.000541 | 32.43937 |
| 0.0135 | 20 | 1.07E-17 | 0.1156  | 59957 | 43065028 | rs6017342   | C  | A | NA | 0.001221 | 73.32189 |
| 0.0134 | 20 | 4.55E-08 | -0.0734 | 59957 | 48955595 | rs6063502   | G  | A | NA | 0.0005   | 30.00323 |
| 0.0132 | 20 | 7.38E-10 | -0.0813 | 59957 | 57855032 | rs154873    | A  | G | NA | 0.000632 | 37.93314 |
| 0.0126 | 21 | 3.98E-31 | -0.1462 | 59957 | 16816017 | rs1297264   | G  | A | NA | 0.00224  | 134.6292 |
| 0.0146 | 21 | 1.96E-29 | -0.1643 | 59957 | 40466299 | rs2836881   | T  | G | NA | 0.002108 | 126.6353 |
| 0.0125 | 21 | 1.83E-24 | -0.128  | 59957 | 45613825 | rs2838517   | C  | T | NA | 0.001746 | 104.8541 |
| 0.0171 | 22 | 4.6E-24  | -0.1732 | 59957 | 39659773 | rs2413583   | T  | C | NA | 0.001708 | 102.5862 |
| 0.016  | 22 | 7.14E-16 | 0.1293  | 59957 | 21916166 | rs5754100   | C  | T | NA | 0.001088 | 65.30442 |
| 0.013  | 22 | 1.47E-08 | 0.0734  | 59957 | 30526632 | rs5763793   | T  | G | NA | 0.000531 | 31.87799 |

---

Table S4. 82 index SNPs represented genetically predicted CD.

| se.exposure | samplesize.exposure | pval.exposure | beta.exposure | pos.exposure | chr.exposure | SNP         | effect_allele.exposure | other_allele.exposure | eaf.exposure | R2       | F-statistic |
|-------------|---------------------|---------------|---------------|--------------|--------------|-------------|------------------------|-----------------------|--------------|----------|-------------|
| 0.0174      | 40266               | 3.99E-10      | -0.1088       | 1.55E+08     | 1            | rs12131079  | T                      | C                     | NA           | 0.00097  | 39.09649    |
| 0.0181      | 40266               | 1.17E-10      | -0.1166       | 2.01E+08     | 1            | rs35730213  | C                      | G                     | NA           | 0.00103  | 41.49716    |
| 0.0227      | 40266               | 1.24E-14      | -0.1748       | 2.07E+08     | 1            | rs3122605   | A                      | G                     | NA           | 0.00147  | 59.29384    |
| 0.0384      | 40266               | 5.11E-09      | -0.2245       | 1.61E+08     | 1            | rs114802258 | T                      | C                     | NA           | 0.000848 | 34.17816    |
| 0.0189      | 40266               | 7.74E-12      | -0.1292       | 1.98E+08     | 1            | rs4316387   | C                      | T                     | NA           | 0.001159 | 46.72829    |
| 0.0286      | 40266               | 1.77E-15      | -0.2275       | 1.14E+08     | 1            | rs6679677   | A                      | C                     | NA           | 0.001569 | 63.27165    |
| 0.0181      | 40266               | 5.1E-22       | 0.1748        | 1.73E+08     | 1            | rs6704109   | T                      | C                     | NA           | 0.002311 | 93.26187    |
| 0.0165      | 40266               | 5.84E-97      | -0.3447       | 67681669     | 1            | rs7517847   | G                      | T                     | NA           | 0.010722 | 436.4084    |
| 0.0185      | 40266               | 9.29E-14      | -0.1376       | 1.03E+08     | 2            | rs11378157  | AG                     | A                     | NA           | 0.001372 | 55.31868    |
| 0.038       | 40266               | 1.75E-08      | -0.2144       | 1.46E+08     | 2            | rs11683692  | C                      | T                     | NA           | 0.00079  | 31.83177    |
| 0.0162      | 40266               | 3.5E-12       | 0.1123        | 25161236     | 2            | rs4343432   | G                      | A                     | NA           | 0.001192 | 48.05161    |
| 0.0163      | 40266               | 4.57E-12      | -0.1124       | 28614401     | 2            | rs11677002  | C                      | T                     | NA           | 0.00118  | 47.54839    |
| 0.0179      | 40266               | 2E-12         | 0.1258        | 2.31E+08     | 2            | rs34004493  | G                      | A                     | NA           | 0.001225 | 49.38939    |
| 0.0162      | 40266               | 1.51E-62      | 0.2704        | 2.34E+08     | 2            | rs3816234   | A                      | G                     | NA           | 0.006871 | 278.5876    |
| 0.0231      | 40266               | 2.85E-14      | 0.1755        | 43851246     | 2            | rs55946629  | A                      | C                     | NA           | 0.001431 | 57.71766    |
| 0.0163      | 40266               | 4.03E-14      | 0.1229        | 61204641     | 2            | rs7608697   | C                      | A                     | NA           | 0.00141  | 56.84693    |
| 0.0161      | 40266               | 9.72E-11      | -0.104        | 1.82E+08     | 2            | rs6740847   | G                      | A                     | NA           | 0.001035 | 41.72471    |
| 0.0212      | 40266               | 5.67E-10      | -0.1312       | 1.88E+08     | 3            | rs56116661  | T                      | C                     | NA           | 0.00095  | 38.29785    |
| 0.017       | 40266               | 3.77E-24      | 0.1722        | 49697459     | 3            | rs9836291   | A                      | G                     | NA           | 0.002542 | 102.5999    |
| 0.0162      | 40266               | 6.46E-09      | -0.0941       | 53133149     | 3            | rs2581828   | G                      | C                     | NA           | 0.000837 | 33.73865    |
| 0.0212      | 40266               | 4.12E-08      | 0.1164        | 26047616     | 4            | rs73243877  | G                      | A                     | NA           | 0.000748 | 30.14482    |



---

|        |       |          |         |          |   |             |   |   |    |          |          |
|--------|-------|----------|---------|----------|---|-------------|---|---|----|----------|----------|
| 0.0163 | 40266 | 8.02E-11 | 0.106   | 1.24E+08 | 4 | rs62324212  | A | C | NA | 0.001049 | 42.28779 |
| 0.0244 | 40266 | 3.44E-16 | 0.1993  | 1.5E+08  | 5 | rs6579807   | T | C | NA | 0.001654 | 66.71345 |
| 0.0174 | 40266 | 1.38E-29 | 0.1969  | 1.59E+08 | 5 | rs755374    | T | C | NA | 0.00317  | 128.0476 |
| 0.0166 | 40266 | 8.26E-56 | 0.2605  | 40411291 | 5 | rs6451494   | C | T | NA | 0.006079 | 246.2508 |
| 0.0243 | 40266 | 3.61E-11 | -0.1612 | 40530242 | 5 | rs112856973 | C | T | NA | 0.001092 | 44.00439 |
| 0.0164 | 40266 | 1.35E-15 | -0.1314 | 96247810 | 5 | rs6873866   | C | T | NA | 0.001592 | 64.19208 |
| 0.016  | 40266 | 5.59E-36 | 0.2004  | 1.32E+08 | 5 | rs2188962   | T | C | NA | 0.003881 | 156.8678 |
| 0.0167 | 40266 | 3.24E-12 | 0.1162  | 1.42E+08 | 5 | rs181826    | A | C | NA | 0.001201 | 48.41253 |
| 0.0198 | 40266 | 7.01E-11 | 0.1291  | 20674811 | 6 | rs1012636   | T | G | NA | 0.001055 | 42.51092 |
| 0.0172 | 40266 | 1.18E-09 | -0.1049 | 91011673 | 6 | rs1321859   | T | C | NA | 0.000923 | 37.19397 |
| 0.0169 | 40266 | 4.04E-17 | 0.1423  | 1.06E+08 | 6 | rs73516754  | C | A | NA | 0.001758 | 70.89487 |
| 0.0159 | 40266 | 9.07E-23 | 0.1566  | 1.67E+08 | 6 | rs35171809  | G | A | NA | 0.002403 | 96.9991  |
| 0.0316 | 40266 | 4.17E-18 | 0.2745  | 31367874 | 6 | rs111281598 | C | T | NA | 0.001871 | 75.45516 |
| 0.0273 | 40266 | 2.39E-09 | 0.163   | 32684630 | 6 | rs6941902   | C | T | NA | 0.000885 | 35.64744 |
| 0.0163 | 40266 | 1.39E-09 | -0.0989 | 21441035 | 6 | rs7753014   | G | C | NA | 0.000913 | 36.81254 |
| 0.0633 | 40266 | 4.31E-42 | 0.8602  | 32247045 | 6 | rs145568234 | G | T | NA | 0.004565 | 184.6587 |
| 0.0432 | 40266 | 2.57E-12 | 0.3027  | 32450319 | 6 | rs9501641   | T | C | NA | 0.001218 | 49.09483 |
| 0.0162 | 40266 | 1.49E-11 | -0.1096 | 1.59E+08 | 6 | rs212409    | A | G | NA | 0.001135 | 45.7688  |
| 0.0173 | 40266 | 8.73E-12 | 0.1183  | 50306780 | 7 | rs9656588   | C | T | NA | 0.00116  | 46.75798 |
| 0.0247 | 40266 | 1.65E-12 | -0.1747 | 1.3E+08  | 8 | rs938650    | A | G | NA | 0.001241 | 50.02307 |
| 0.0165 | 40266 | 1.15E-15 | 0.132   | 1.27E+08 | 8 | rs4380956   | A | G | NA | 0.001587 | 63.99682 |
| 0.0344 | 40266 | 8.9E-11  | 0.2234  | 1.45E+08 | 8 | rs79832570  | C | T | NA | 0.001046 | 42.17236 |
| 0.0177 | 40266 | 1.76E-21 | 0.1687  | 1.18E+08 | 9 | rs10114470  | C | T | NA | 0.002251 | 90.83685 |
| 0.0169 | 40266 | 8.54E-23 | -0.166  | 4984530  | 9 | rs1887428   | C | G | NA | 0.00239  | 96.47642 |
| 0.0162 | 40266 | 3.14E-30 | 0.1848  | 1.39E+08 | 9 | rs4077515   | T | C | NA | 0.003221 | 130.1225 |

---

|        |       |          |         |          |    |            |   |   |    |          |          |
|--------|-------|----------|---------|----------|----|------------|---|---|----|----------|----------|
| 0.0171 | 40266 | 4.13E-11 | 0.1131  | 1.12E+08 | 10 | rs10884966 | A | G | NA | 0.001085 | 43.74329 |
| 0.0261 | 40266 | 1.98E-08 | 0.1468  | 6094697  | 10 | rs61839660 | T | C | NA | 0.000785 | 31.63367 |
| 0.0189 | 40266 | 8.31E-12 | -0.1293 | 30805480 | 10 | rs2002695  | G | A | NA | 0.001161 | 46.80065 |
| 0.0162 | 40266 | 2.35E-29 | 0.1827  | 64438771 | 10 | rs10822050 | C | T | NA | 0.003149 | 127.182  |
| 0.0161 | 40266 | 2.89E-11 | 0.1074  | 75655628 | 10 | rs2675670  | C | G | NA | 0.001104 | 44.49746 |
| 0.0167 | 40266 | 2.09E-15 | -0.1323 | 35496626 | 10 | rs1148246  | T | C | NA | 0.001556 | 62.75743 |
| 0.0179 | 40266 | 1.92E-17 | -0.1522 | 81042475 | 10 | rs1250573  | A | G | NA | 0.001792 | 72.2939  |
| 0.016  | 40266 | 3.44E-25 | -0.1658 | 1.01E+08 | 10 | rs6584282  | G | A | NA | 0.00266  | 107.3761 |
| 0.0161 | 40266 | 8.51E-28 | 0.176   | 76299649 | 11 | rs11236797 | A | C | NA | 0.002959 | 119.4956 |
| 0.0178 | 40266 | 1.06E-09 | 0.1083  | 6493100  | 12 | rs28999107 | T | G | NA | 0.000919 | 37.0165  |
| 0.0185 | 40266 | 4.13E-09 | -0.1089 | 1.13E+08 | 12 | rs77566919 | A | G | NA | 0.00086  | 34.649   |
| 0.0504 | 40266 | 1.95E-21 | 0.4794  | 40824663 | 12 | rs34635748 | T | C | NA | 0.002242 | 90.47184 |
| 0.0189 | 40266 | 9.11E-14 | 0.141   | 44475398 | 13 | rs1373904  | G | A | NA | 0.00138  | 55.65357 |
| 0.0161 | 40266 | 1.24E-09 | 0.0975  | 69282887 | 14 | rs194746   | T | C | NA | 0.00091  | 36.67211 |
| 0.0267 | 40266 | 8.31E-14 | 0.199   | 88417517 | 14 | rs3850378  | C | T | NA | 0.001378 | 55.54719 |
| 0.0187 | 40266 | 2.26E-19 | 0.1684  | 67441750 | 15 | rs72743461 | A | C | NA | 0.00201  | 81.09226 |
| 0.0182 | 40266 | 2.63E-09 | -0.1082 | 11344903 | 16 | rs2021511  | T | C | NA | 0.000877 | 35.34192 |
| 0.0167 | 40266 | 8.87E-14 | 0.1243  | 28494421 | 16 | rs42861    | G | A | NA | 0.001374 | 55.39719 |
| 0.0174 | 40266 | 1.8E-108 | 0.385   | 50756881 | 16 | rs2076756  | G | A | NA | 0.012013 | 489.5549 |
| 0.0209 | 40266 | 2.09E-10 | -0.1327 | 50353529 | 16 | rs7195228  | G | C | NA | 0.001    | 40.31138 |
| 0.0382 | 40266 | 6.05E-47 | 0.5495  | 50866917 | 16 | rs72798422 | C | T | NA | 0.005113 | 206.9127 |
| 0.0176 | 40266 | 1.26E-09 | 0.1067  | 82867456 | 16 | rs10492862 | A | C | NA | 0.000912 | 36.75208 |
| 0.0163 | 40266 | 5.15E-10 | 0.1016  | 25856486 | 17 | rs2948542  | G | A | NA | 0.000964 | 38.84997 |
| 0.0181 | 40266 | 2.49E-17 | -0.1531 | 32617265 | 17 | rs714910   | C | A | NA | 0.001774 | 71.54374 |
| 0.016  | 40266 | 4.31E-19 | 0.1426  | 38043649 | 17 | rs12936409 | T | C | NA | 0.001969 | 79.42871 |

---

|        |       |          |         |          |    |             |   |   |    |          |          |
|--------|-------|----------|---------|----------|----|-------------|---|---|----|----------|----------|
| 0.0162 | 40266 | 1.8E-12  | -0.1142 | 40514201 | 17 | rs744166    | G | A | NA | 0.001233 | 49.69133 |
| 0.0244 | 40266 | 1.34E-20 | 0.2268  | 12818922 | 18 | rs80262450  | A | G | NA | 0.002141 | 86.39426 |
| 0.047  | 40266 | 2.69E-15 | -0.3712 | 10492274 | 19 | rs144309607 | T | C | NA | 0.001547 | 62.37329 |
| 0.0201 | 40266 | 8.61E-13 | 0.144   | 33753200 | 19 | rs62126620  | A | G | NA | 0.001273 | 51.32291 |
| 0.0193 | 40266 | 6.03E-21 | 0.1811  | 1123652  | 19 | rs4807570   | A | G | NA | 0.002182 | 88.04419 |
| 0.0165 | 40266 | 2.65E-11 | -0.1098 | 44634912 | 20 | rs3761158   | A | G | NA | 0.001099 | 44.28078 |
| 0.0163 | 40266 | 1.59E-27 | -0.1769 | 16816017 | 21 | rs1297264   | G | A | NA | 0.002917 | 117.7766 |
| 0.0165 | 40266 | 1.14E-14 | 0.1277  | 34776695 | 21 | rs2284553   | G | A | NA | 0.001485 | 59.89524 |
| 0.0162 | 40266 | 2.03E-19 | -0.1456 | 45613825 | 21 | rs2838517   | C | T | NA | 0.002002 | 80.77392 |
| 0.0223 | 40266 | 6.84E-21 | -0.2087 | 39660829 | 22 | rs2143178   | C | T | NA | 0.00217  | 87.58175 |
| 0.0206 | 40266 | 3.02E-16 | 0.1687  | 21916166 | 22 | rs5754100   | C | T | NA | 0.001663 | 67.06164 |

---

Table S5. 60 index SNPs represented genetically predicted UC.

| se.exposure | beta.exposure | chr.exposure | pos.exposure | pval.exposure | samplesize.exposure | SNP        | effect_allele.exposure | other_allele.exposure | eaf.exposure | R2       | F-statistic |
|-------------|---------------|--------------|--------------|---------------|---------------------|------------|------------------------|-----------------------|--------------|----------|-------------|
| 0.016       | -0.1168       | 1            | 2496649      | 2.53E-13      | 45975               | rs7544646  | G                      | C                     | NA           | 0.001158 | 53.28768    |
| 0.0209      | 0.21          | 1            | 2.07E+08     | 7.46E-24      | 45975               | rs3024493  | A                      | C                     | NA           | 0.002191 | 100.9548    |
| 0.0178      | -0.1587       | 1            | 20142413     | 3.91E-19      | 45975               | rs3820330  | A                      | C                     | NA           | 0.001726 | 79.48679    |
| 0.0358      | -0.483        | 1            | 67705958     | 1.99E-41      | 45975               | rs11209026 | A                      | G                     | NA           | 0.003944 | 182.0159    |
| 0.016       | -0.1569       | 1            | 1.61E+08     | 1.17E-22      | 45975               | rs6658353  | C                      | G                     | NA           | 0.002087 | 96.15836    |
| 0.0178      | -0.1448       | 1            | 2.01E+08     | 4.27E-16      | 45975               | rs7554511  | A                      | C                     | NA           | 0.001437 | 66.1726     |
| 0.021       | -0.1389       | 1            | 8180210      | 3.42E-11      | 45975               | rs7523335  | A                      | G                     | NA           | 0.000951 | 43.74687    |
| 0.0229      | 0.1375        | 1            | 2E+08        | 1.8E-09       | 45975               | rs2816954  | A                      | T                     | NA           | 0.000784 | 36.05085    |
| 0.0203      | 0.1818        | 1            | 20140036     | 2.9E-19       | 45975               | rs1317209  | A                      | G                     | NA           | 0.001741 | 80.20045    |
| 0.0264      | 0.1605        | 1            | 1.52E+08     | 1.3E-09       | 45975               | rs79051659 | A                      | G                     | NA           | 0.000803 | 36.95927    |
| 0.0159      | -0.2217       | 1            | 20227723     | 2.61E-44      | 45975               | rs4654925  | C                      | G                     | NA           | 0.004211 | 194.4098    |
| 0.0161      | 0.1597        | 2            | 61204641     | 3.03E-23      | 45975               | rs7608697  | C                      | A                     | NA           | 0.002136 | 98.38733    |
| 0.0166      | 0.1054        | 2            | 2E+08        | 2.09E-10      | 45975               | rs55905347 | A                      | G                     | NA           | 0.000876 | 40.3131     |
| 0.0171      | 0.1226        | 2            | 2E+08        | 8.08E-13      | 45975               | rs62180181 | T                      | C                     | NA           | 0.001117 | 51.40079    |
| 0.0167      | 0.1433        | 2            | 2.42E+08     | 1.19E-17      | 45975               | rs4676408  | A                      | G                     | NA           | 0.001599 | 73.62758    |
| 0.0223      | -0.1299       | 2            | 2.29E+08     | 6.09E-09      | 45975               | rs1811711  | G                      | C                     | NA           | 0.000738 | 33.93045    |
| 0.0168      | 0.1593        | 3            | 49714225     | 2.18E-21      | 45975               | rs1131095  | C                      | T                     | NA           | 0.001952 | 89.90712    |
| 0.0171      | 0.1714        | 5            | 1.59E+08     | 9.73E-24      | 45975               | rs755374   | T                      | C                     | NA           | 0.002181 | 100.464     |
| 0.0206      | -0.1223       | 5            | 554211       | 2.89E-09      | 45975               | rs72704802 | T                      | C                     | NA           | 0.000766 | 35.24517    |
| 0.0166      | 0.0974        | 5            | 1.34E+08     | 4.62E-09      | 45975               | rs17715902 | A                      | G                     | NA           | 0.000748 | 34.42571    |
| 0.0228      | 0.1318        | 5            | 40347469     | 7.87E-09      | 45975               | rs6889364  | A                      | G                     | NA           | 0.000726 | 33.41506    |

---

|        |         |    |          |          |       |             |   |   |    |          |          |
|--------|---------|----|----------|----------|-------|-------------|---|---|----|----------|----------|
| 0.0159 | 0.09    | 5  | 1.5E+08  | 1.54E-08 | 45975 | rs17656349  | T | C | NA | 0.000696 | 32.03848 |
| 0.0171 | 0.0944  | 5  | 1.77E+08 | 3.27E-08 | 45975 | rs67111717  | G | A | NA | 0.000662 | 30.47424 |
| 0.0184 | -0.1102 | 6  | 29941617 | 1.96E-09 | 45975 | rs9260809   | G | A | NA | 0.00078  | 35.86812 |
| 0.028  | 0.2486  | 6  | 32044834 | 6.54E-19 | 45975 | rs9267798   | C | G | NA | 0.001712 | 78.8256  |
| 0.0165 | -0.1468 | 6  | 32583653 | 4.65E-19 | 45975 | rs28383224  | G | A | NA | 0.001719 | 79.15263 |
| 0.0584 | 0.5033  | 6  | 31030303 | 6.58E-18 | 45975 | rs3734851   | A | G | NA | 0.001613 | 74.26929 |
| 0.0436 | 0.2944  | 6  | 1.12E+08 | 1.48E-11 | 45975 | rs13200059  | A | G | NA | 0.000991 | 45.59149 |
| 0.0188 | 0.1486  | 6  | 1.38E+08 | 2.69E-15 | 45975 | rs6933404   | C | T | NA | 0.001357 | 62.47453 |
| 0.0531 | -0.3066 | 6  | 19781009 | 7.59E-09 | 45975 | rs113986290 | T | C | NA | 0.000725 | 33.33776 |
| 0.0179 | -0.1206 | 7  | 2788912  | 1.47E-11 | 45975 | rs798506    | C | T | NA | 0.000986 | 45.39099 |
| 0.0158 | 0.0995  | 7  | 1.29E+08 | 3.23E-10 | 45975 | rs4728142   | A | G | NA | 0.000862 | 39.65638 |
| 0.016  | -0.1214 | 7  | 1.07E+08 | 3.28E-14 | 45975 | rs989960    | T | C | NA | 0.001251 | 57.56765 |
| 0.016  | -0.1512 | 7  | 1.07E+08 | 4.11E-21 | 45975 | rs10272963  | T | C | NA | 0.001939 | 89.29862 |
| 0.0166 | -0.167  | 9  | 4984530  | 9.65E-24 | 45975 | rs1887428   | C | G | NA | 0.002197 | 101.204  |
| 0.017  | 0.1332  | 9  | 1.18E+08 | 4.42E-15 | 45975 | rs10817678  | A | G | NA | 0.001334 | 61.38916 |
| 0.016  | 0.1335  | 9  | 1.39E+08 | 6.5E-17  | 45975 | rs3812565   | C | T | NA | 0.001512 | 69.61514 |
| 0.016  | 0.1276  | 10 | 64445564 | 1.33E-15 | 45975 | rs10761659  | G | A | NA | 0.001381 | 63.59786 |
| 0.0239 | -0.1342 | 10 | 27179596 | 1.84E-08 | 45975 | rs7911117   | G | T | NA | 0.000685 | 31.52756 |
| 0.0159 | -0.1525 | 10 | 1.01E+08 | 6.71E-22 | 45975 | rs7911680   | C | A | NA | 0.001997 | 91.98702 |
| 0.0159 | 0.1252  | 11 | 76281593 | 2.8E-15  | 45975 | rs2212434   | T | C | NA | 0.001347 | 62.00055 |
| 0.0169 | -0.1063 | 11 | 1.14E+08 | 2.83E-10 | 45975 | rs2045241   | A | G | NA | 0.00086  | 39.56163 |
| 0.0161 | 0.1889  | 12 | 68492980 | 7.33E-32 | 45975 | rs12825700  | A | G | NA | 0.002985 | 137.6554 |
| 0.0202 | 0.1571  | 13 | 27536972 | 6.58E-15 | 45975 | rs1359946   | A | G | NA | 0.001314 | 60.48264 |
| 0.0184 | 0.1078  | 15 | 67455630 | 4.66E-09 | 45975 | rs56062135  | T | C | NA | 0.000746 | 34.32282 |
| 0.02   | -0.1174 | 16 | 23847062 | 4.14E-09 | 45975 | rs11645239  | G | C | NA | 0.000749 | 34.4554  |

---

|        |         |    |          |          |       |             |    |   |    |          |          |
|--------|---------|----|----------|----------|-------|-------------|----|---|----|----------|----------|
| 0.0189 | 0.1071  | 16 | 68587692 | 1.41E-08 | 45975 | rs7203363   | A  | T | NA | 0.000698 | 32.10971 |
| 0.0214 | 0.1357  | 16 | 86009740 | 2.18E-10 | 45975 | rs16940186  | C  | T | NA | 0.000874 | 40.20807 |
| 0.0229 | -0.1627 | 17 | 70611194 | 1.15E-12 | 45975 | rs113846785 | CG | C | NA | 0.001097 | 50.47604 |
| 0.0158 | 0.1365  | 17 | 38043649 | 5.62E-18 | 45975 | rs12936409  | T  | C | NA | 0.001621 | 74.63323 |
| 0.0219 | 0.147   | 17 | 40759937 | 2.01E-11 | 45975 | rs11651246  | G  | T | NA | 0.000979 | 45.0534  |
| 0.0204 | 0.1548  | 19 | 33754044 | 2.92E-14 | 45975 | rs10408351  | A  | G | NA | 0.001251 | 57.57881 |
| 0.0308 | 0.1759  | 19 | 10562802 | 1.08E-08 | 45975 | rs78064630  | A  | G | NA | 0.000709 | 32.61455 |
| 0.017  | 0.1944  | 20 | 43065028 | 3.95E-30 | 45975 | rs6017342   | C  | A | NA | 0.002836 | 130.7603 |
| 0.0186 | -0.2217 | 21 | 40466299 | 1.11E-32 | 45975 | rs2836881   | T  | G | NA | 0.003081 | 142.0648 |
| 0.016  | -0.1177 | 21 | 45613825 | 1.78E-13 | 45975 | rs2838517   | C  | T | NA | 0.001176 | 54.11206 |
| 0.0161 | -0.1227 | 21 | 16833222 | 2.22E-14 | 45975 | rs1736161   | A  | G | NA | 0.001262 | 58.07891 |
| 0.0227 | -0.1494 | 22 | 39662480 | 5.11E-11 | 45975 | rs9611131   | C  | T | NA | 0.000941 | 43.31423 |
| 0.0179 | -0.0988 | 22 | 30253256 | 3.54E-08 | 45975 | rs4993442   | T  | G | NA | 0.000662 | 30.46414 |
| 0.0158 | 0.1011  | 22 | 50439430 | 1.5E-10  | 45975 | rs137845    | G  | A | NA | 0.00089  | 40.94202 |

---

Table S6. 13 index SNPs represented genetically predicted IL-6 levels.

| chr.exposure | pos.exposure | beta.exposure | se.exposure | pval.exposure | samplesize.exposure | SNP         | effect_allele.exposure | other_allele.exposure | eaf.exposure | R2       | F-statistic |
|--------------|--------------|---------------|-------------|---------------|---------------------|-------------|------------------------|-----------------------|--------------|----------|-------------|
| 1            | 1.82E+08     | 0.4099        | 0.0893      | 4.44E-06      | 21758               | rs111572787 | T                      | C                     | 0.0109       | 0.003623 | 79.10571    |
| 1            | 1.54E+08     | 0.1747        | 0.0124      | 3.34E-45      | 21758               | rs2228145   | C                      | A                     | 0.3786       | 0.01436  | 316.9776    |
| 1            | 43014917     | -0.1821       | 0.0379      | 1.51E-06      | 21758               | rs148924545 | G                      | A                     | 0.0376       | 0.0024   | 52.33785    |
| 2            | 1.55E+08     | -0.0573       | 0.0122      | 2.69E-06      | 21758               | rs1444691   | G                      | A                     | 0.402        | 0.001579 | 34.39788    |
| 3            | 1.64E+08     | -0.0679       | 0.0147      | 4.11E-06      | 21758               | rs9811834   | T                      | A                     | 0.4542       | 0.002286 | 49.84518    |
| 3            | 1.08E+08     | -0.1956       | 0.0418      | 2.92E-06      | 21758               | rs80316479  | T                      | C                     | 0.027        | 0.00201  | 43.82251    |
| 4            | 55033811     | -0.4095       | 0.0884      | 3.57E-06      | 21758               | rs34032964  | T                      | A                     | 0.0127       | 0.004205 | 91.87553    |
| 5            | 1.59E+08     | 0.0631        | 0.0128      | 8.68E-07      | 21758               | rs7448500   | G                      | C                     | 0.694        | 0.001691 | 36.85392    |
| 7            | 1.4E+08      | -0.2511       | 0.0506      | 7.01E-07      | 21758               | rs76598619  | C                      | T                     | 0.0237       | 0.002918 | 63.66535    |
| 11           | 1.22E+08     | -0.3623       | 0.0731      | 7.16E-07      | 21758               | rs144530765 | G                      | A                     | 0.0126       | 0.003266 | 71.29025    |
| 16           | 4439131      | 0.068         | 0.0147      | 3.95E-06      | 21758               | rs1530088   | T                      | C                     | 0.7709       | 0.001633 | 35.59262    |
| 19           | 30102856     | -0.0617       | 0.0133      | 3.74E-06      | 21758               | rs2288477   | G                      | A                     | 0.3368       | 0.001701 | 37.06254    |
| 19           | 35481231     | -0.071        | 0.0155      | 4.52E-06      | 21758               | rs2651097   | A                      | G                     | 0.2506       | 0.001893 | 41.27086    |

Table S7. 7 index SNPs represented genetically predicted IL-6 $\alpha$ .

| chr.exposure | pos.exposure | beta.exposure | se.exposure | pval.exposure | samplesize.exposure | SNP         | effect_allele.exposure | other_allele.exposure | eaf.exposure | R2       | F-statistic |
|--------------|--------------|---------------|-------------|---------------|---------------------|-------------|------------------------|-----------------------|--------------|----------|-------------|
| 1            | 1.54E+08     | 0.3009        | 0.0321      | 6.62E-21      | 21758               | rs61805738  | A                      | G                     | 0.0363       | 0.006335 | 138.6953    |
| 1            | 1.54E+08     | 0.3534        | 0.0128      | 1.2E-168      | 21758               | rs72633650  | C                      | T                     | 0.138        | 0.029713 | 666.2364    |
| 1            | 1.55E+08     | 0.452         | 0.0123      | 1E-200        | 21758               | rs11264224  | C                      | A                     | 0.181        | 0.060572 | 1402.764    |
| 1            | 1.53E+08     | 0.1956        | 0.0279      | 2.42E-12      | 21758               | rs72702900  | A                      | T                     | 0.0396       | 0.00291  | 63.49796    |
| 1            | 1.54E+08     | -0.5735       | 0.0395      | 9.27E-48      | 21758               | rs116141616 | A                      | G                     | 0.0274       | 0.01753  | 388.1874    |
| 1            | 1.55E+08     | -0.2534       | 0.012       | 1.19E-98      | 21758               | rs61811421  | T                      | C                     | 0.2443       | 0.023709 | 528.343     |
| 1            | 1.55E+08     | -0.0577       | 0.0103      | 2.21E-08      | 21758               | rs1218552   | A                      | G                     | 0.6463       | 0.001522 | 33.16587    |



Table S8. Information of outliers detected by MR PRESSO.

| MR PRESSO: NbDistribution = 3000 |                      |                  |                           |
|----------------------------------|----------------------|------------------|---------------------------|
| <b>exposure</b>                  | <b>outcome</b>       | <b>structure</b> | <b>outliers (SNP)</b>     |
| IBD                              | Global               | TH               | rs11236797                |
| IBD                              | lateralorbitofrontal | SA               | rs62378712<br>rs62408218  |
| IBD                              | parstriangularis     | SA               | rs6584282                 |
| IBD                              | transversetemporal   | SA               | rs6873866                 |
| IBD                              | cuneus               | TH               | rs80262450                |
| IBD                              | insula               | TH               | rs111456533<br>rs11734570 |
| IBD                              | isthmuscingulate     | TH               | rs111456533               |
| IBD                              | medialorbitofrontal  | TH               | rs11236797                |
| CD                               | lingual              | SA               | rs12131079                |
| CD                               | pericalcarine        | SA               | rs42861                   |
| CD                               | superiorparietal     | SA               | rs3761158<br>rs5754100    |
| CD                               | temporalpole         | SA               | rs73243877                |
| CD                               | transversetemporal   | SA               | rs2188962<br>rs6873866    |
| CD                               | cuneus               | TH               | rs80262450                |
| CD                               | isthmuscingulate     | TH               | rs2188962                 |
| CD                               | superiorfrontal      | TH               | rs42861                   |

---

|      |                      |    |             |
|------|----------------------|----|-------------|
| UC   | global               | TH | rs13200059  |
|      |                      |    | rs2212434   |
| UC   | entorhinal           | SA | rs7554511   |
| UC   | superiorfrontal      | SA | rs7554511   |
| UC   | superiortemporal     | SA | rs7523335   |
| UC   | parahippocampal      | TH | rs7554511   |
| IL-6 | lateralorbitofrontal | SA | rs7448500   |
| IL-6 | pericalcarine        | SA | rs148924545 |
| IL-6 | caudalmiddlefrontal  | TH | rs111572787 |
| IL-6 | precentral           | TH | rs1444691   |
|      |                      |    | rs7448500   |

---

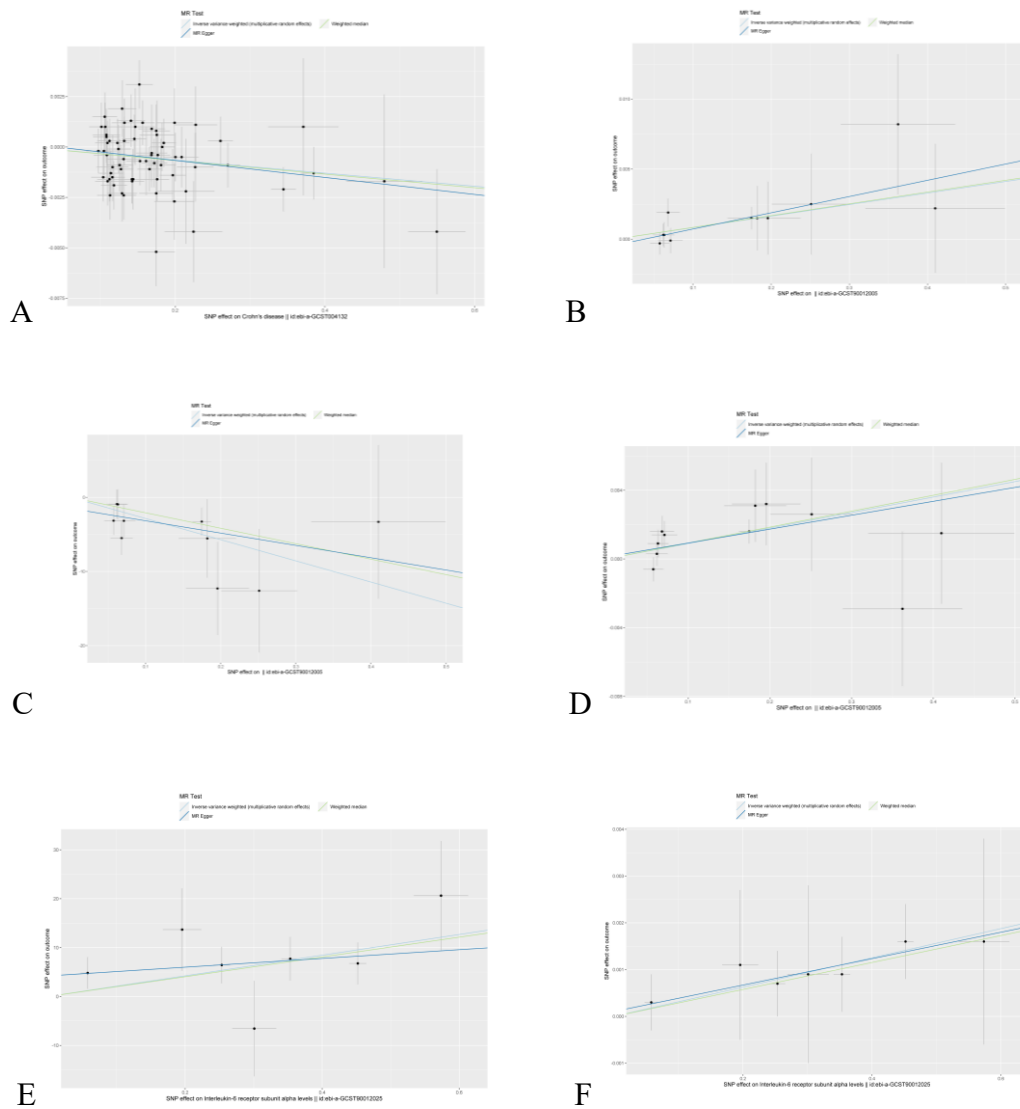

Figure S1. Scatter plots of significant results from MR analysis. (A) genetically predicted CD on TH of pars orbitalis; (B) genetically predicted IL-6 on TH of fusiform; (C) genetically predicted IL-6 on SA of middle temporal; (D) genetically predicted IL-6 on TH of pars opercularis; (E) genetically predicted IL-6R $\alpha$  on SA of superior frontal; (F) genetically predicted IL-6R $\alpha$  on TH of supramarginal.

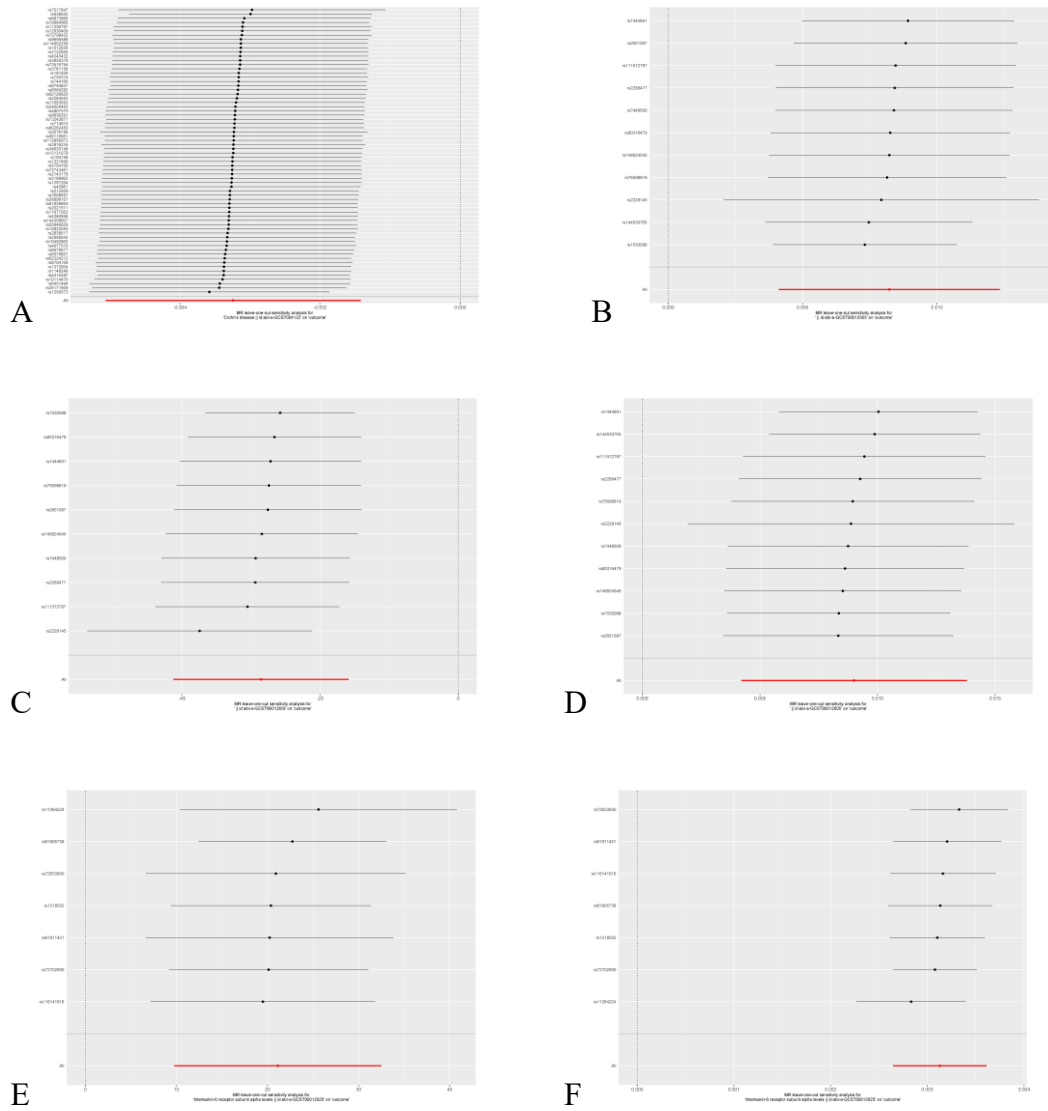

Figure S2. Leave-one-out analysis of significant results from MR analysis. (A) genetically predicted CD on TH of pars orbitalis; (B) genetically predicted IL-6 on TH of fusiform; (C) genetically predicted IL-6 on SA of middle temporal; (D) genetically predicted IL-6 on TH of pars opercularis; (E) genetically predicted IL-6R $\alpha$  on SA of superior frontal; (F) genetically predicted IL-6R $\alpha$  on TH of supramarginal.

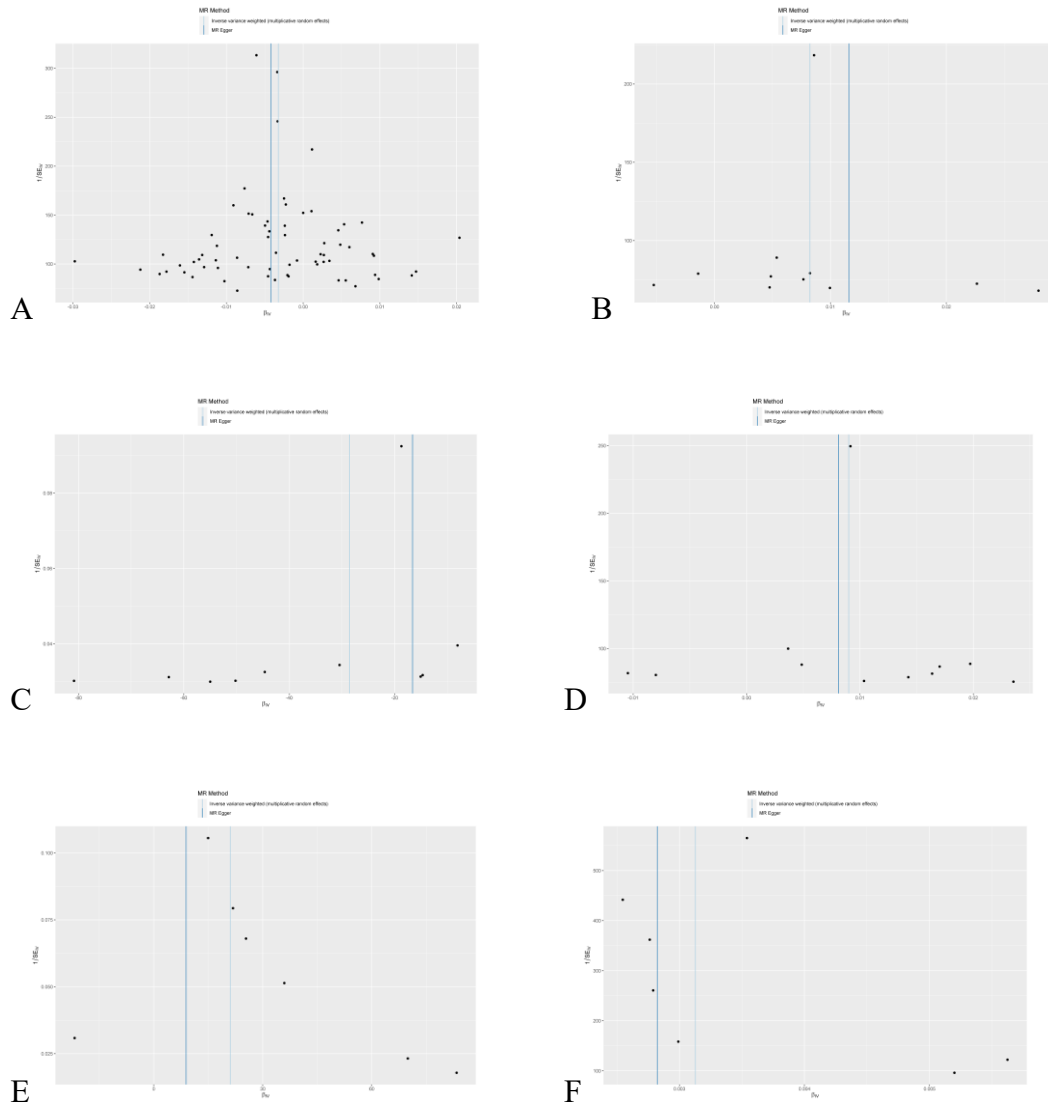

Figure S3. Funnel plots of significant results from MR analysis. (A) genetically predicted CD on TH of pars orbitalis; (B) genetically predicted IL-6 on TH of fusiform; (C) genetically predicted IL-6 on SA of middle temporal; (D) genetically predicted IL-6 on TH of pars opercularis; (E) genetically predicted IL-6Rα on SA of superior frontal; (F) genetically predicted IL-6Rα on TH of supramarginal.

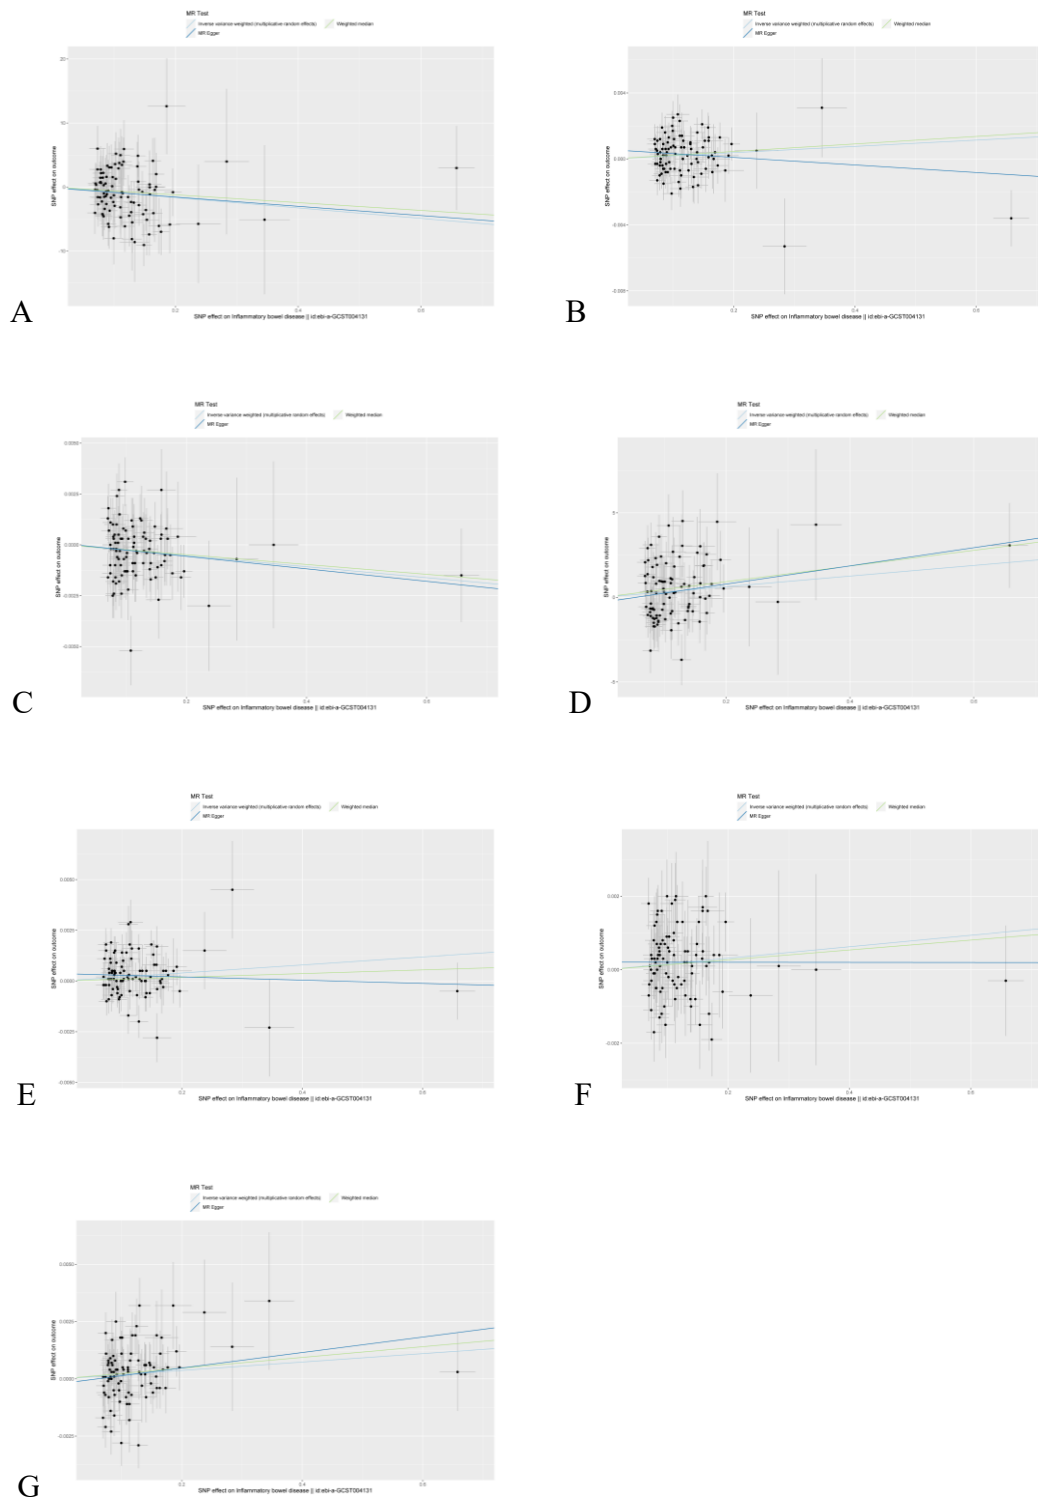

Figure S4. Scatter plots of nominal significant results from genetically predicted IBD on brain cortical structures. (A) SA of inferior parietal; (B) TH of paracentral; (C) TH of pars orbitalis; (D) SA of pars triangularis; (E) TH of postcentral; (F) TH of precentral; (G) TH of cuneus.

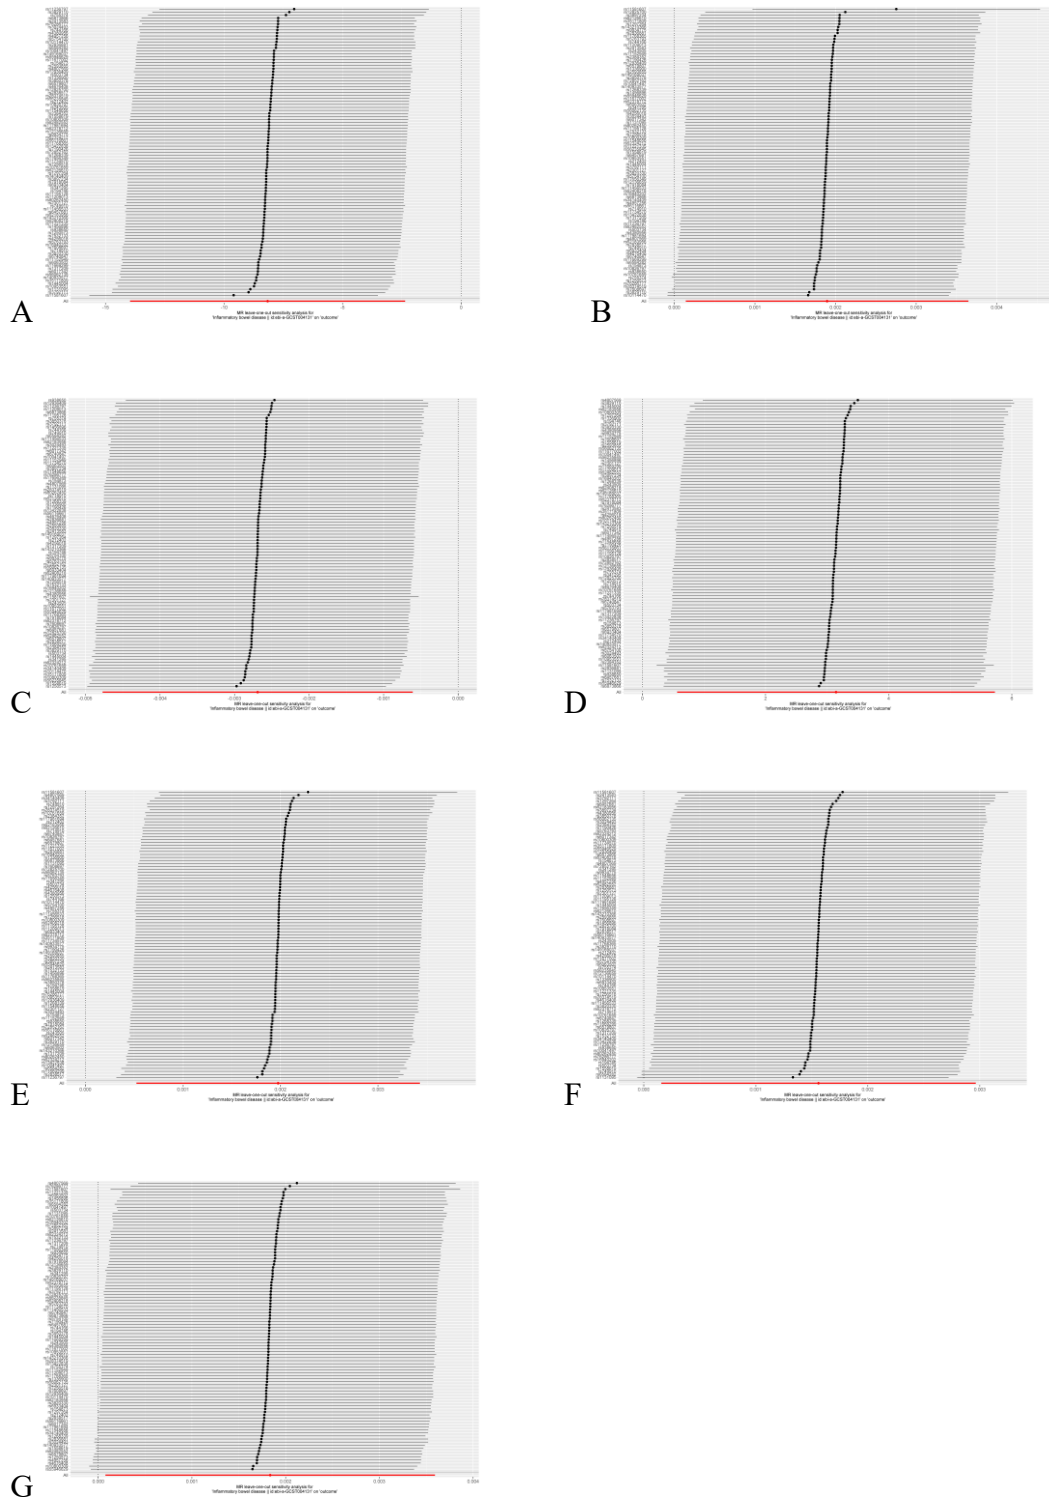

Figure S5. Leave-one-out analysis of nominal significant results from genetically predicted IBD on brain cortical structures. (A) SA of inferior parietal; (B) TH of paracentral; (C) TH of pars orbitalis; (D) SA of pars triangularis; (E) TH of postcentral; (F) TH of precentral. (G) TH of cuneus.

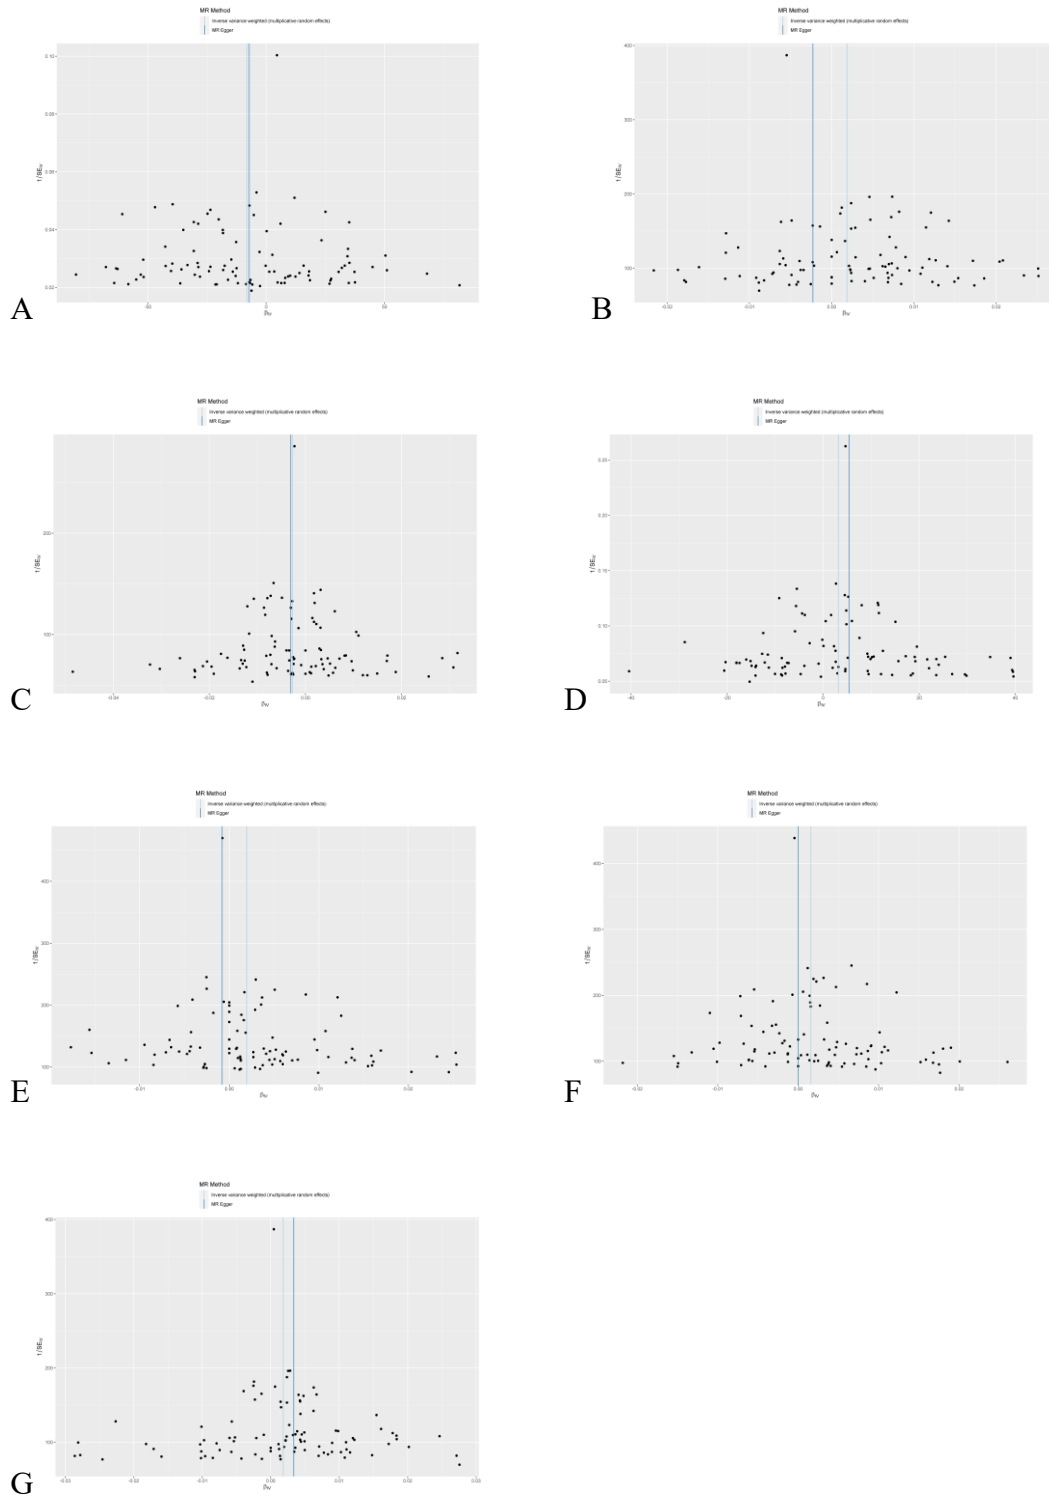

Figure S6. Funnel plots of nominal significant results from genetically predicted IBD on brain cortical structures. (A) SA of inferior parietal; (B) TH of paracentral; (C) TH of pars orbitalis; (D) SA of pars triangularis; (E) TH of postcentral; (F) TH of precentral. (G) TH of cuneus.



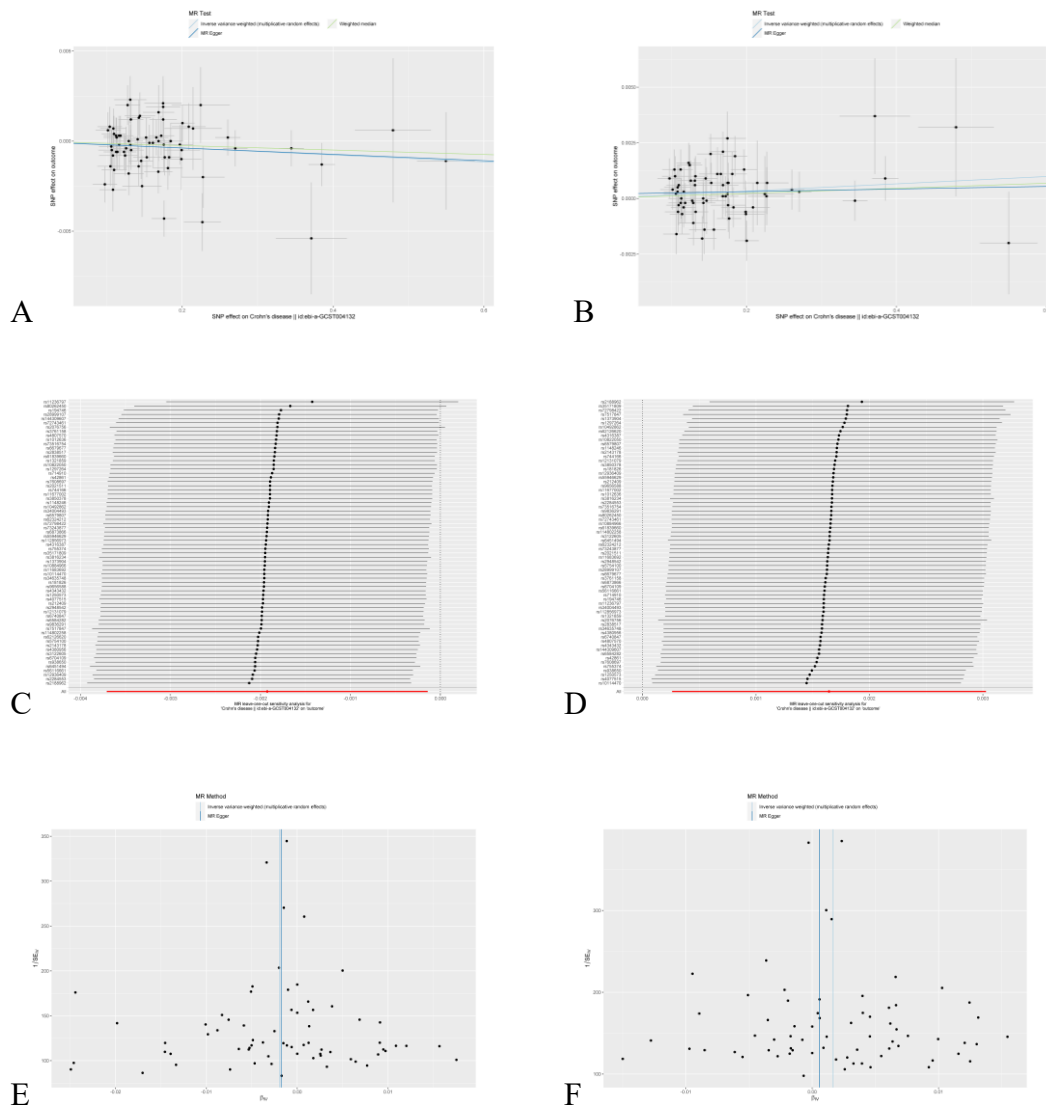

Figure S7. Sensitivity analysis of nominal significant results from genetically predicted CD on brain cortical structures. (A) Scatter plots on TH of medial orbitofrontal; (B) Scatter plots on TH of paracentral; (C) Leave-one-out analysis on TH of medial orbitofrontal; (D) Leave-one-out analysis on TH of paracentral; (E) Funnel plots on TH of medial orbitofrontal; (F) Funnel plots on TH of paracentral.

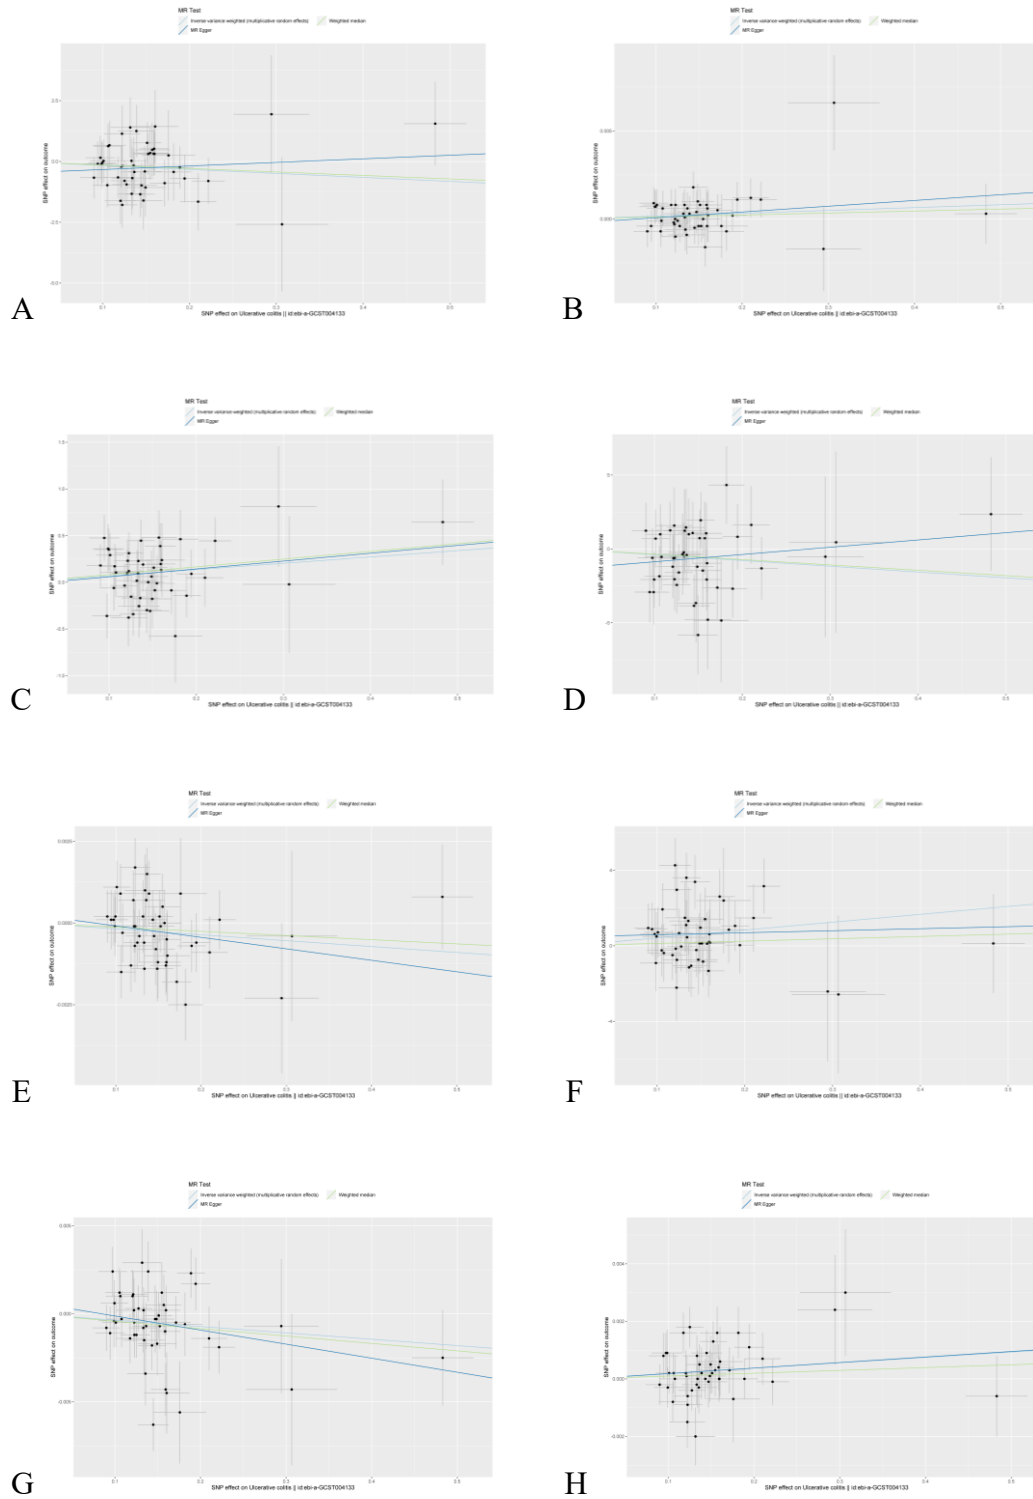

Figure S8. Scatter plots of nominal significant results from genetically predicted UC on brain cortical structures. (A) SA of bankssts; (B) TH of cuneus; (C) SA of frontal pole; (D) SA of fusiform; (E) TH of fusiform; (F) SA of insula; (G) TH of isthmus cingulate; (H) TH of postcentral

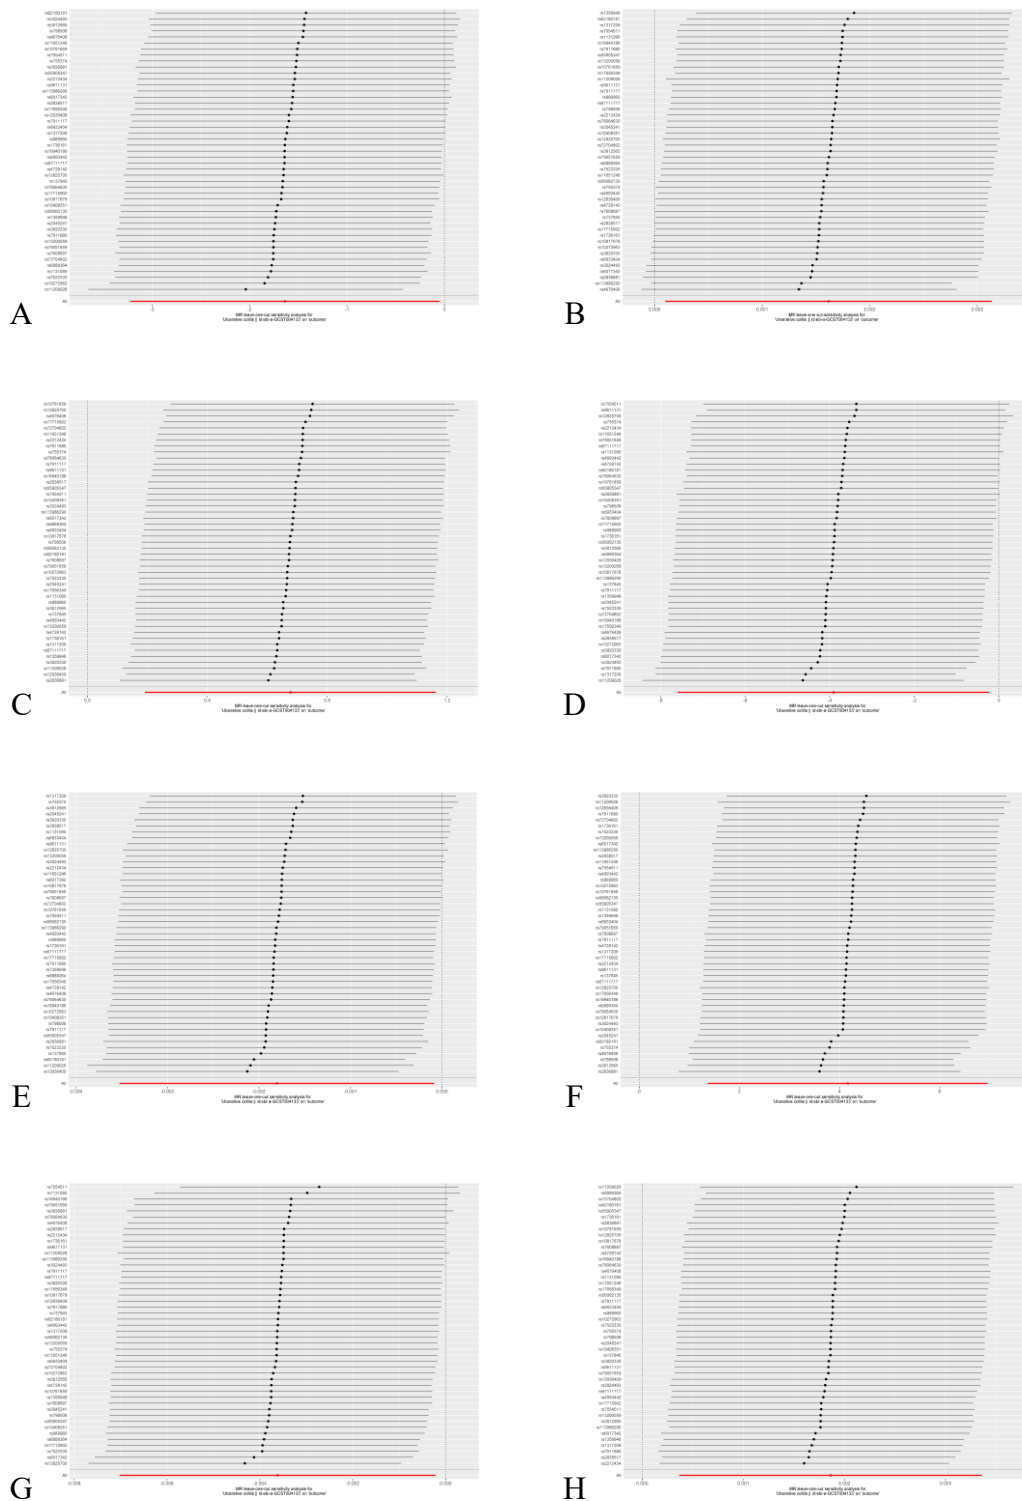

Figure S9. Leave-one-out analysis of nominal significant results from genetically predicted UC on brain cortical structures. (A) SA of bankssts; (B) TH of cuneus; (C) SA of frontal pole; (D) SA of fusiform; (E) TH of fusiform; (F) SA of insula; (G) TH of isthmus cingulate; (H) TH of postcentral.

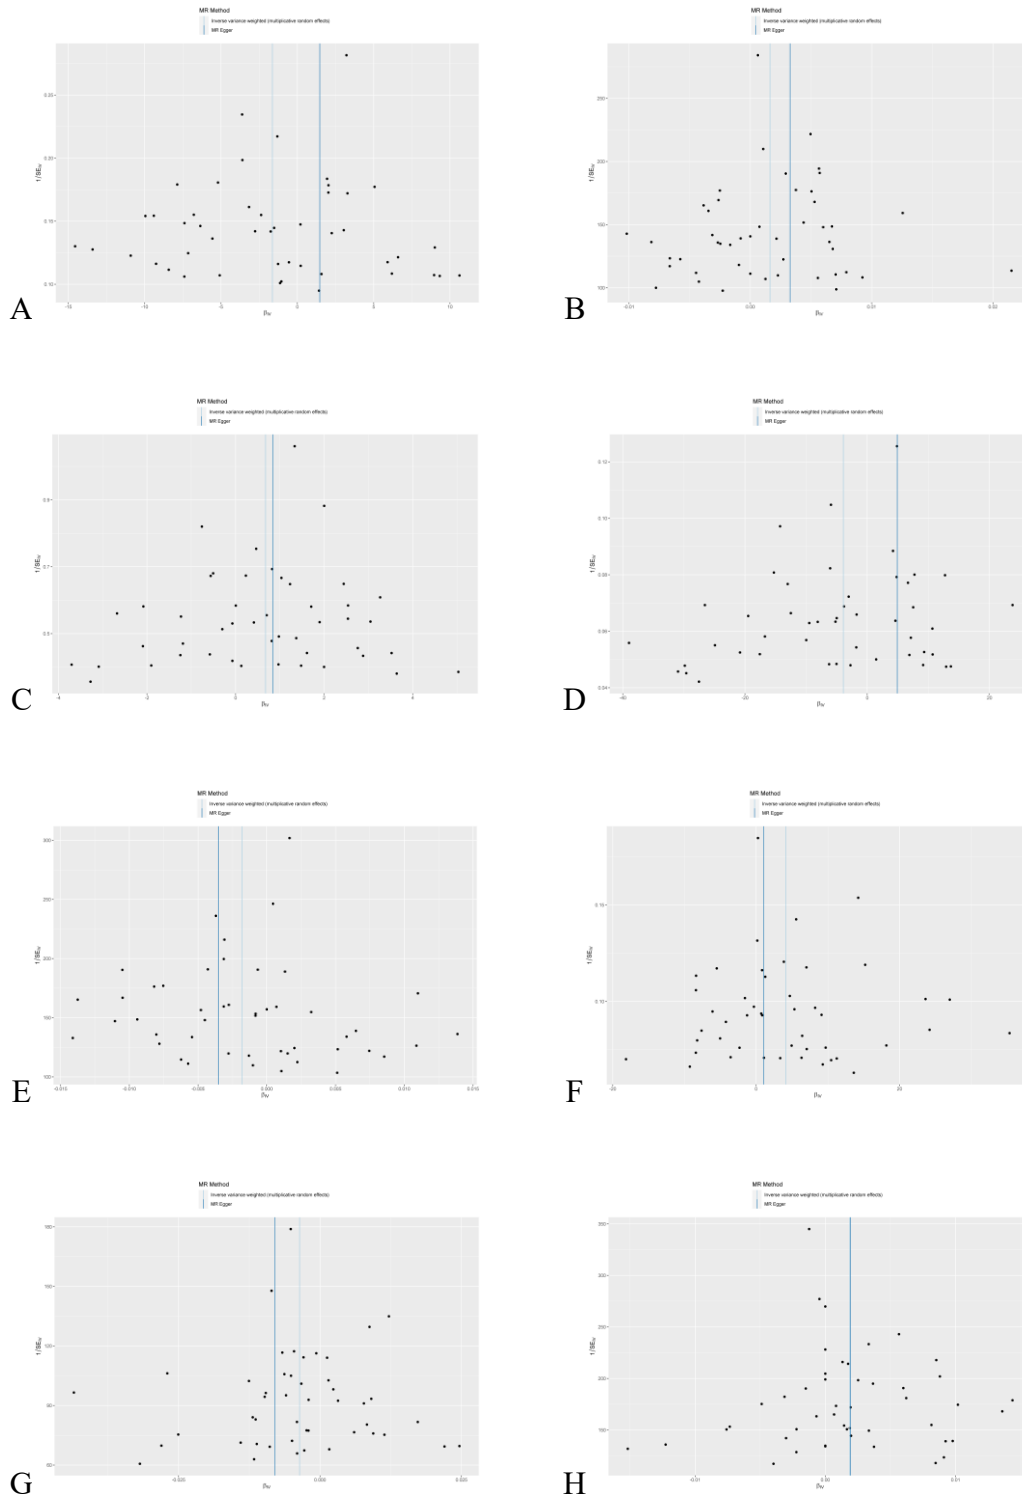

Figure S10. Funnel plots of nominal significant results from genetically predicted UC on brain cortical structures. (A) SA of bankssts; (B) TH of cuneus; (C) SA of frontal pole; (D) SA of fusiform; (E) TH of fusiform; (F) SA of insula; (G) TH of isthmus cingulate; (H) TH of postcentral.

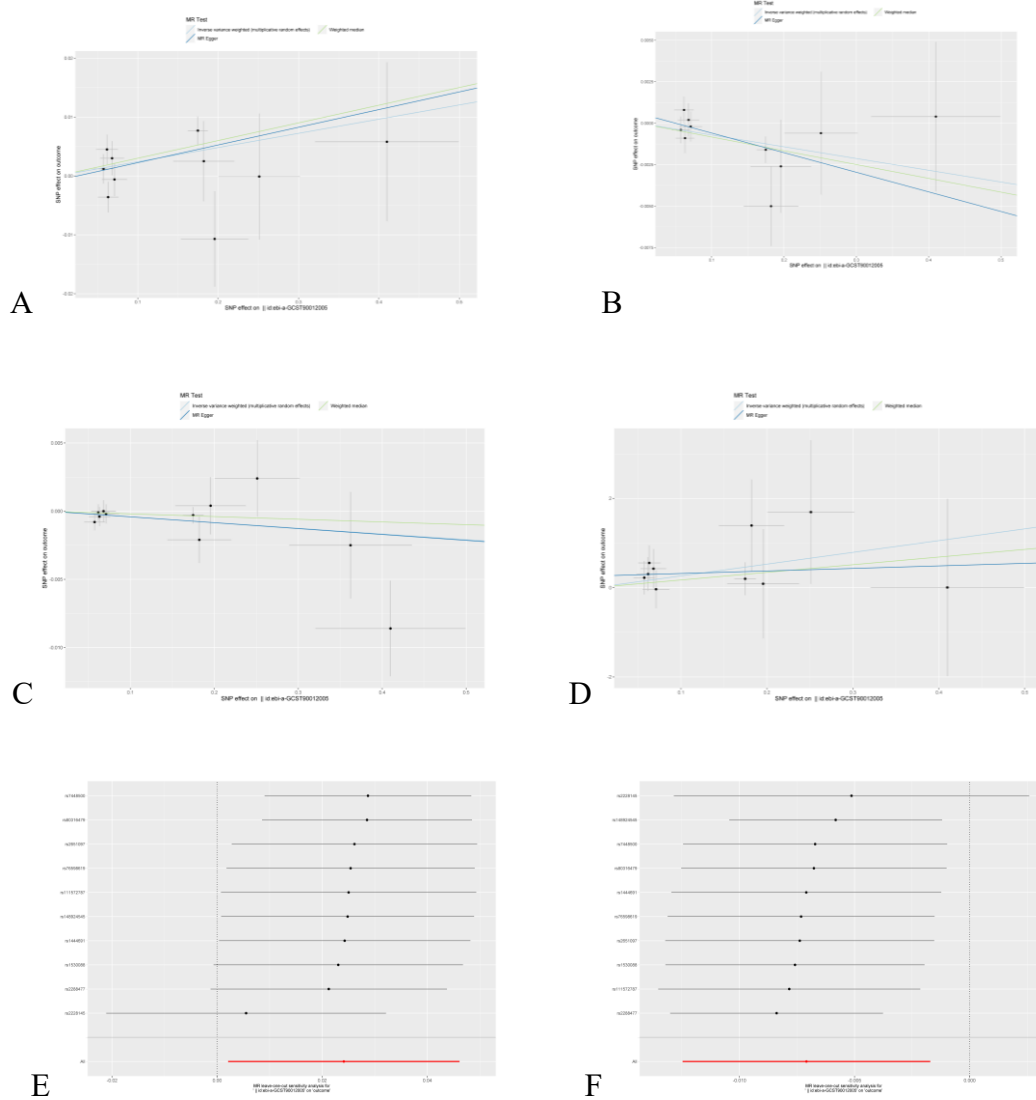

Figure S11. Sensitivity analysis of nominal significant results from genetically predicted IL-6 on brain cortical structures. (A) Scatter plots on TH of entorhinal;(B) Scatter plots on TH of pericalcarine; (C) Scatter plots on TH of superior parietal; (D) Scatter plots on SA of temporal pole; (E)Leave-one-out analysis on TH of entorhinal; (F) Leave-one-out analysis on TH of pericalcarine.

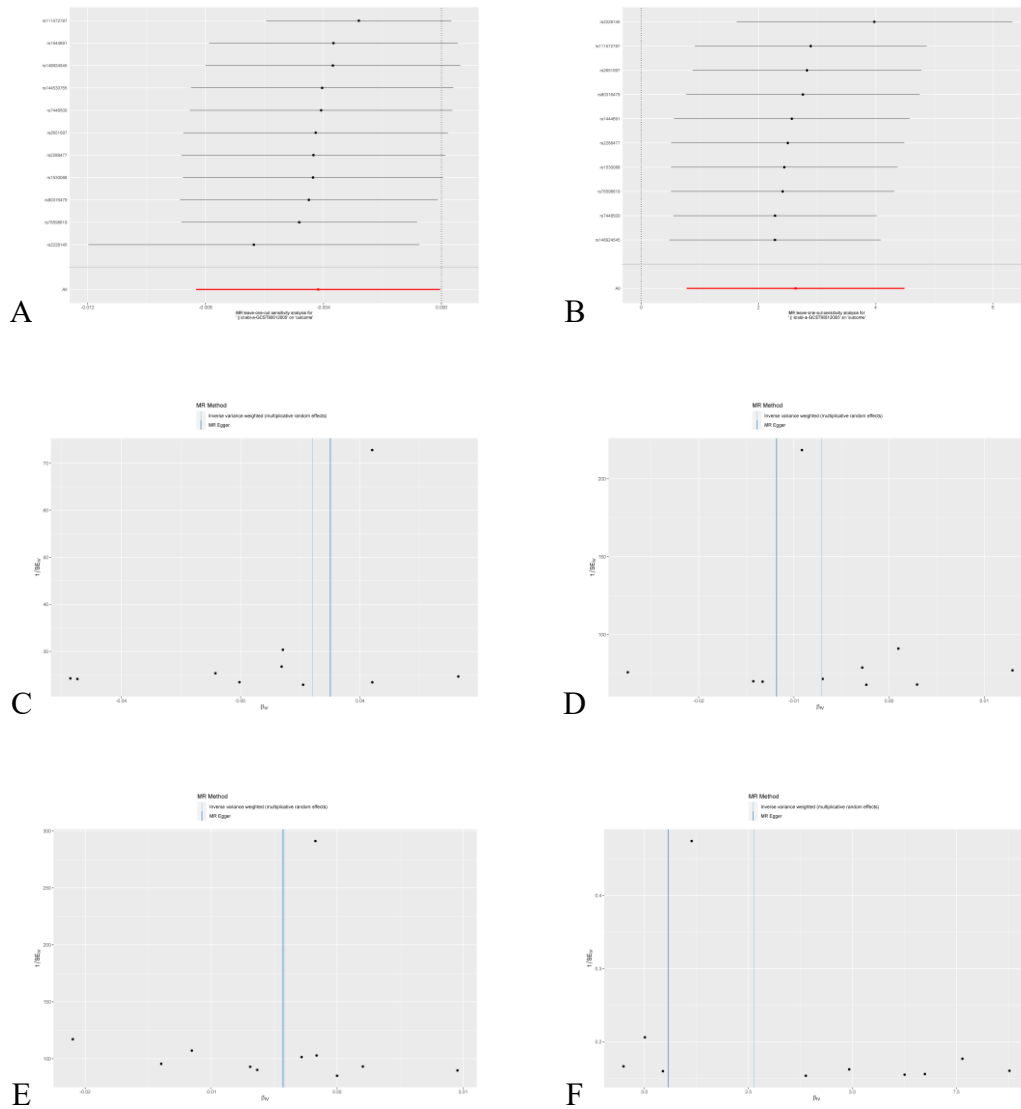

Figure S12. Sensitivity analysis of nominal significant results from genetically predicted IL-6 on brain cortical structures. (A) Leave-one-out analysis on TH of entorhinal;(B) Leave-one-out analysis on TH of pericalcarine; (C) Funnel plots on TH of superior parietal; (D) Funnel plots on SA of temporal pole; (E) Funnel plots on TH of entorhinal; (F) Funnel plots on TH of pericalcarine.

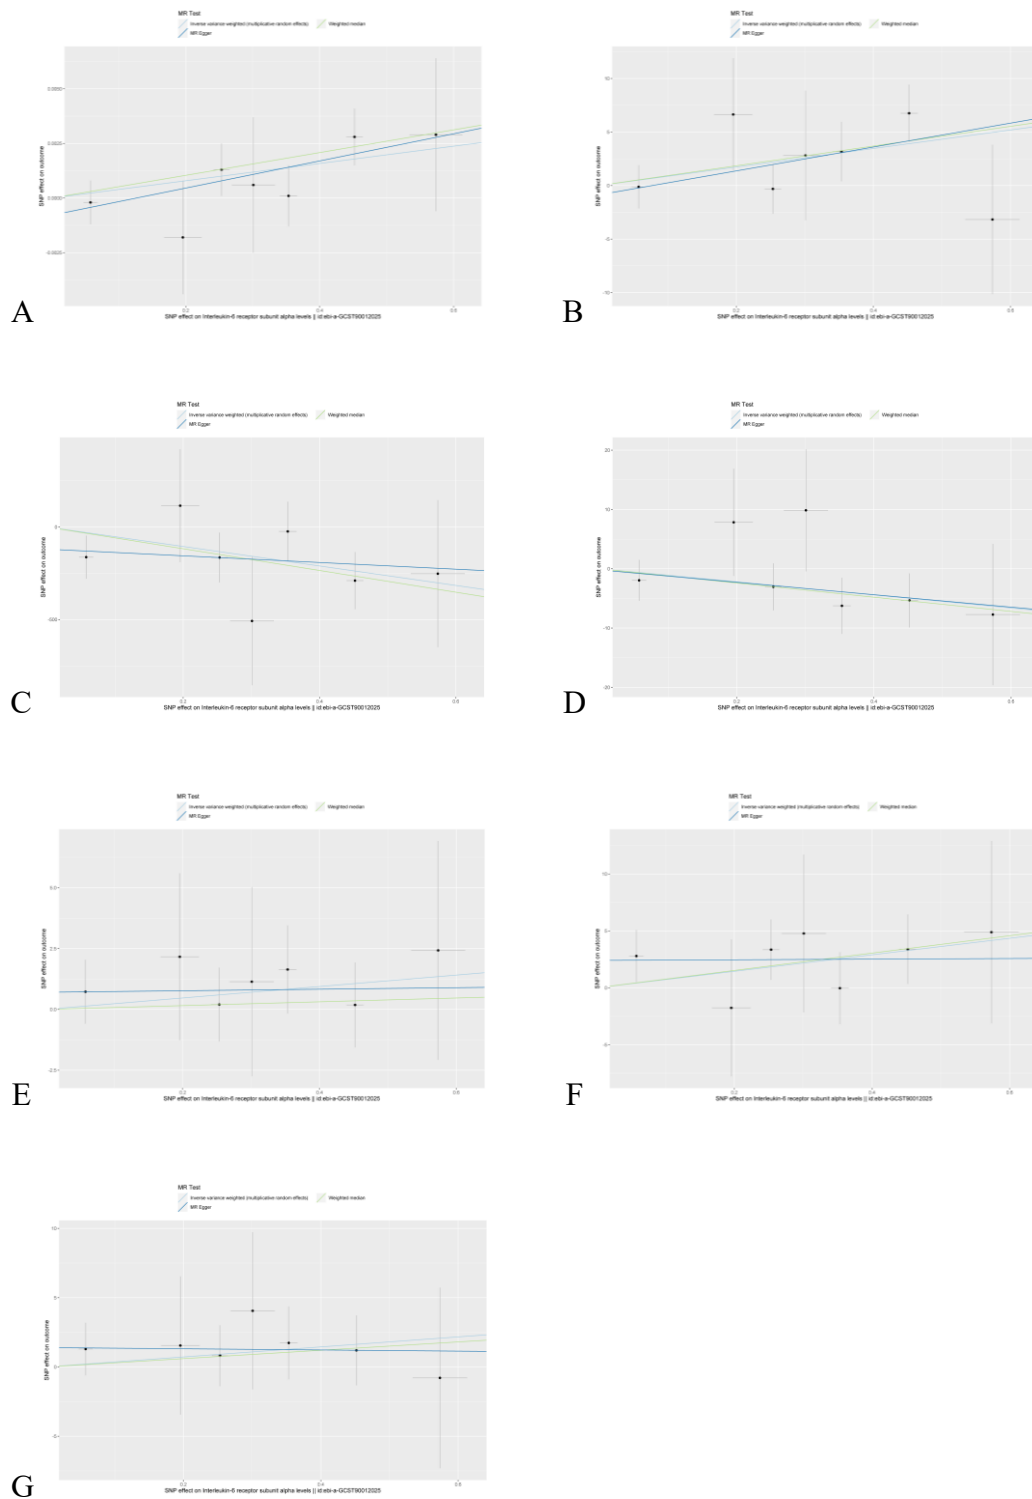

Figure S13. Scatter plots of nominal significant results from genetically predicted IL-6 $\alpha$  on brain cortical structures. (A) TH of bankssts; (B) SA of fusiform; (C) SA of Global; (D) SA of inferior parietal; (E) SA of pars triangularis; (F) SA of precuneus; (G) SA of superior temporal.

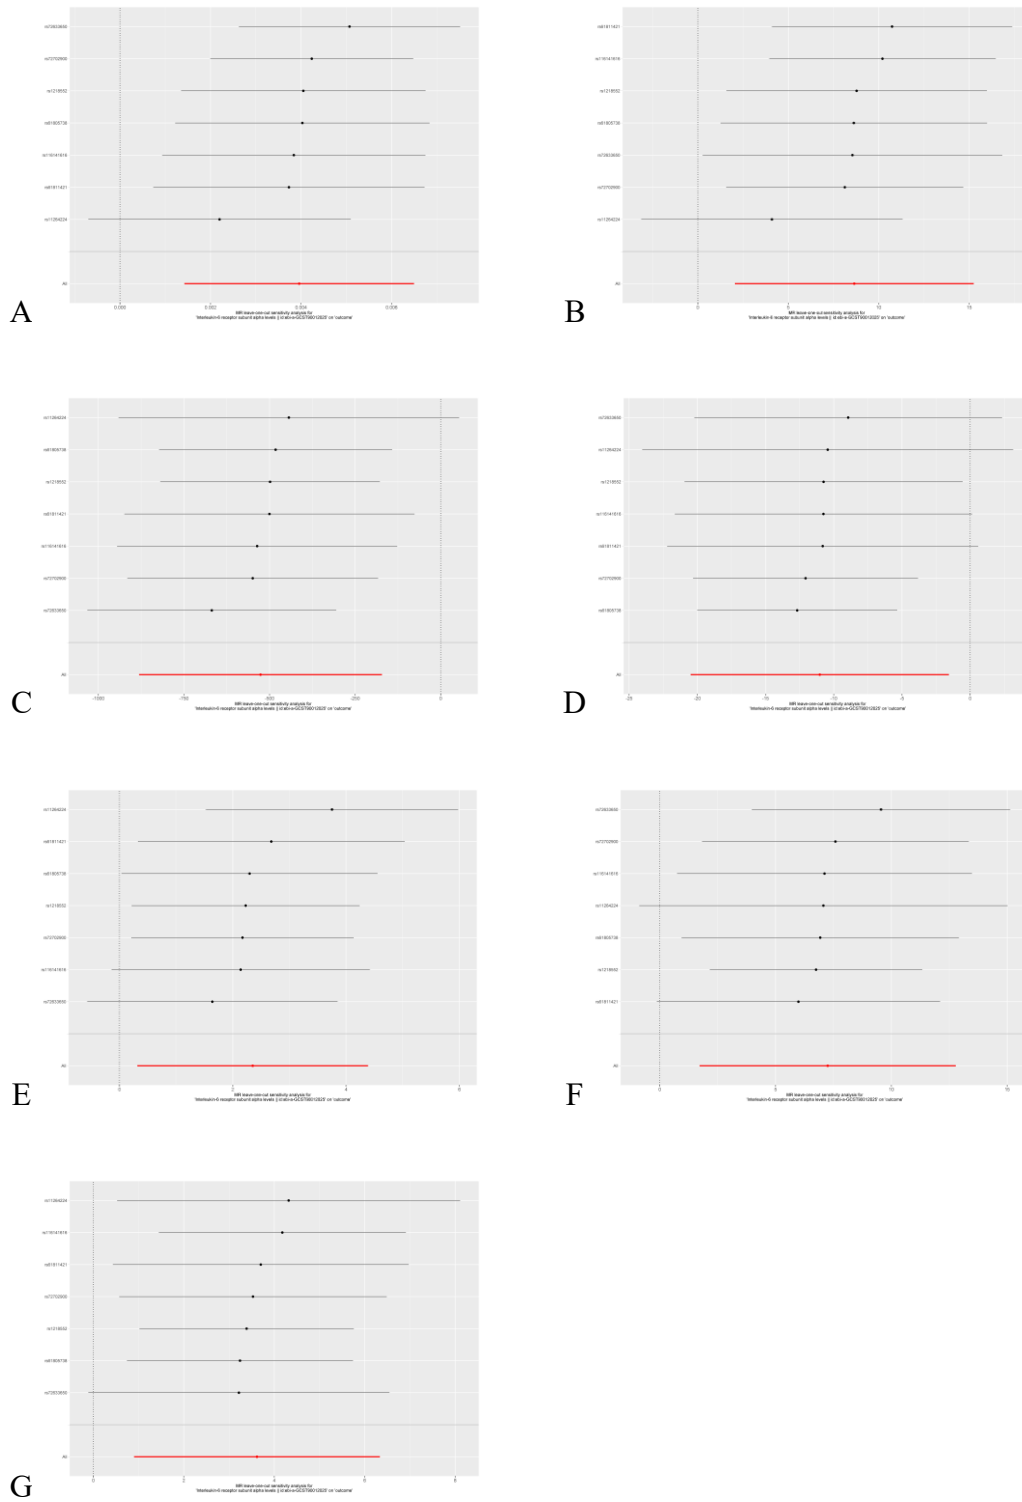

Figure S14. Leave-one-out analysis of nominal significant results from genetically predicted IL-6 $\alpha$  on brain cortical structures. (A) TH of bankssts; (B) SA of fusiform; (C) SA of Global; (D) SA of inferior parietal; (E) SA of pars triangularis; (F) SA of precuneus; (G) SA of superior temporal.



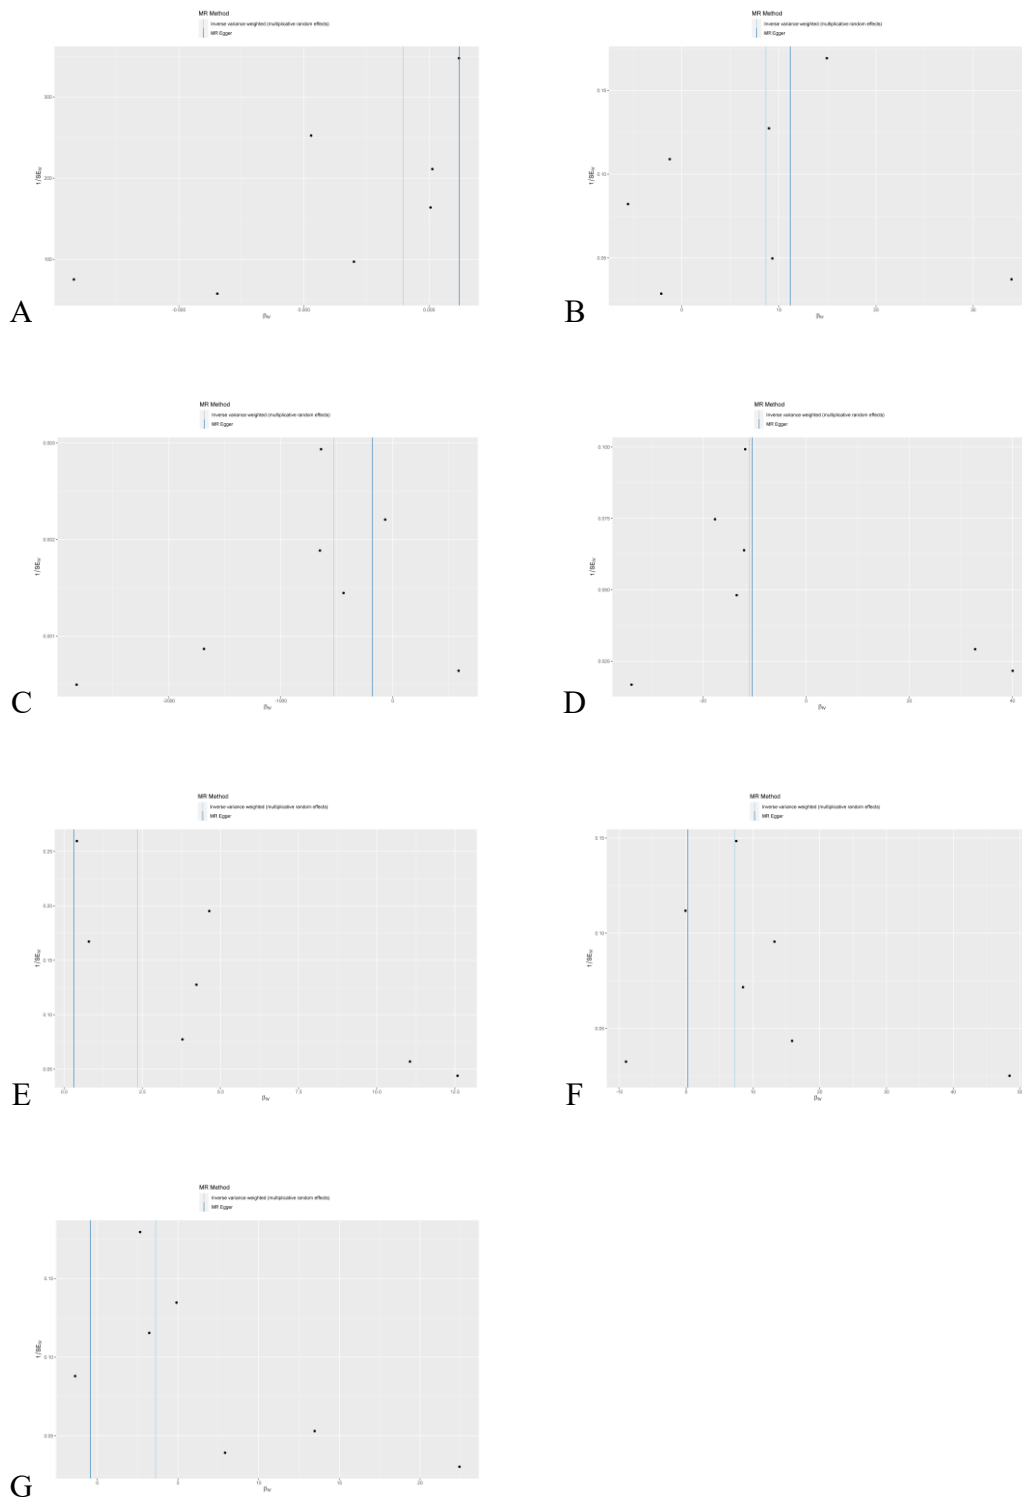

Figure S15. Funnel plots of nominal significant results from genetically predicted IL-6 $\alpha$  on brain cortical structures. (A) TH of bankssts; (B) SA of fusiform; (C) SA of Global; (D) SA of inferior parietal; (E) SA of pars triangularis; (F) SA of precuneus; (G) SA of superior temporal.
